# Supplementary material
Source: Research Square preprint supplement (doi:10.21203/rs.3.rs-6822856/v1)
Supplement: Supplementary file 1 [file 92f74347c5609fddabb625fe.docx]

| **Supplementary**  **Figure/Table** | **Contents** | **Page** |
| --- | --- | --- |
| Table S1 | List of all extracted radiomic features. | 1-3 |
| Table S2 | Top 10 and top 5 selected radiomic features. | 4 |
| Table S3 | Model performance metrics; OvA classification. | 5 |
| Table S4 | Model performance metrics; MC classification. | 6 |
| Table S5 | Model contingency tables and accuracies; Pitt, OvA, top 10 features | 7 |
| Table S6 | Model contingency tables and accuracies; Pitt, OvA, top 5 features | 8 |
| Table S7 | Model contingency tables and accuracies; Pitt, MC, top 10 features | 9 |
| Table S8 | Model contingency tables and accuracies; Pitt, MC, top 5 features | 10 |
| Table S9 | Model contingency tables and accuracies; NIH, OvA, top 10 features | 11 |
| Table S10 | Model contingency tables and accuracies; NIH, OvA, top 5 features | 12 |
| Table S11 | Model contingency tables and accuracies; NIH, MC, top 10 features | 13 |
| Table S12 | Model contingency tables and accuracies; NIH, MC, top 5 features | 14 |
| Figure S1 | Confusion matrices; Pitt, OvA, top 10 features | 15 |
| Figure S2 | Confusion matrices; Pitt, OvA, top 5 features | 16 |
| Figure S3 | Confusion matrices; Pitt, MC, top 10 features | 17 |
| Figure S4 | Confusion matrices; Pitt, MC, top 5 features | 18 |
| Figure S5 | Confusion matrices; NIH, OvA, top 10 features | 19 |
| Figure S6 | Confusion matrices; NIH, OvA, top 5 features | 20 |
| Figure S7 | Confusion matrices; NIH, MC, top 10 features | 21 |
| Figure S8 | Confusion matrices; NIH, MC, top 5 features | 22 |
| Figure S9 | ROC curves and AUC values; Pitt, OvA, top 10 features | 23 |
| Figure S10 | ROC curves and AUC values; Pitt, OvA, top 5 features | 24 |
| Figure S11 | ROC curves and AUC values; Pitt, MC, top 10 features | 25 |
| Figure S12 | ROC curves and AUC values; Pitt, MC, top 5 features | 26 |
| Figure S13 | ROC curves and AUC values; NIH, OvA, top 10 features | 27 |
| Figure S14 | ROC curves and AUC values; NIH, OvA, top 5 features | 28 |
| Figure S15 | ROC curves and AUC values; NIH, MC, top 10 features | 29 |
| Figure S16 | ROC curves and AUC values; NIH, MC, top 5 features | 30 |

| First order features (PET) | SUVmax |
| --- | --- |
| First order features (CT) | original_firstorder_Skewness |
| original_firstorder_Kurtosis |
| original_firstorder_Mean |
| original_firstorder_Variance |
| original_firstorder_Median |
| original_firstorder_StandardDeviation |
| Second order features (CT) | original_glcm_Autocorrelation |
| original_glcm_JointAverage |
| original_glcm_ClusterProminence |
| original_glcm_ClusterShade |
| original_glcm_ClusterTendency |
| original_glcm_Contrast |
| original_glcm_Correlation |
| original_glcm_DifferenceAverage |
| original_glcm_DifferenceEntropy |
| original_glcm_DifferenceVariance |
| original_glcm_JointEnergy |
| original_glcm_JointEntropy |
| original_glcm_Imc1 |
| original_glcm_Imc2 |
| original_glcm_Idm |
| original_glcm_Idmn |
| original_glcm_Id |
| original_glcm_Idn |
| original_glcm_InverseVariance |
| original_glcm_MaximumProbability |
| original_glcm_SumEntropy |
| original_glcm_SumSquares |
| original_glrlm_GrayLevelNonUniformity |
| original_glrlm_GrayLevelNonUniformityNormalized |
| original_glrlm_GrayLevelVariance |
| original_glrlm_HighGrayLevelRunEmphasis |
| original_glrlm_LongRunEmphasis |
| original_glrlm_LongRunHighGrayLevelEmphasis |
| original_glrlm_LongRunLowGrayLevelEmphasis |
| original_glrlm_LowGrayLevelRunEmphasis |
| original_glrlm_RunEntropy |
| original_glrlm_RunLengthNonUniformity |
| original_glrlm_RunLengthNonUniformityNormalized |
| original_glrlm_RunPercentage |
| original_glrlm_RunVariance |
| original_glrlm_ShortRunEmphasis |
| original_glrlm_ShortRunHighGrayLevelEmphasis |
| original_glrlm_ShortRunLowGrayLevelEmphasis |
| original_glszm_GrayLevelNonUniformity |
| original_glszm_GrayLevelNonUniformityNormalized |
| original_glszm_GrayLevelVariance |
| original_glszm_HighGrayLevelZoneEmphasis |
| original_glszm_LargeAreaEmphasis |
| original_glszm_LargeAreaHighGrayLevelEmphasis |
| original_glszm_LargeAreaLowGrayLevelEmphasis |
| original_glszm_LowGrayLevelZoneEmphasis |
| original_glszm_SizeZoneNonUniformity |
| original_glszm_SizeZoneNonUniformityNormalized |
| original_glszm_SmallAreaEmphasis |
| original_glszm_SmallAreaHighGrayLevelEmphasis |
| original_glszm_SmallAreaLowGrayLevelEmphasis |
| original_glszm_ZoneEntropy |
| original_glszm_ZonePercentage |
| original_glszm_ZoneVariance |
| original_gldm_DependenceEntropy |
| original_gldm_DependenceNonUniformity |
| original_gldm_DependenceNonUniformityNormalized |
| original_gldm_DependenceVariance |
| original_gldm_GrayLevelNonUniformity |
| original_gldm_GrayLevelVariance |
| original_gldm_HighGrayLevelEmphasis |
| original_gldm_LargeDependenceEmphasis |
| original_gldm_LargeDependenceHighGrayLevelEmphasis |
| original_gldm_LargeDependenceLowGrayLevelEmphasis |
| original_gldm_LowGrayLevelEmphasis |
| original_gldm_SmallDependenceEmphasis |
| original_gldm_SmallDependenceHighGrayLevelEmphasis |
| original_gldm_SmallDependenceLowGrayLevelEmphasis |

**Table S1.** All extracted features. GLSZM = gray level size zone matrix, GLRLM = gray level run length matrix, GLDM = gray level dependence matrix, GLCM = gray level co-occurrence matrix

| **Dataset** | **Feature** |
| --- | --- |
| Pitt | original_glcm_Idmn |
| original_glrlm_GrayLevelNonUniformityNormalized |
| original_glszm_SmallAreaHighGrayLevelEmphasis |
| original_glcm_Idn |
| original_glszm_ZonePercentage |
| original_glcm_Contrast |
| original_glcm_Imc2 |
| original_glcm_DifferenceAverage |
| original_glcm_DifferenceVariance |
| original_gldm_SmallDependenceHighGrayLevelEmphasis |
| NIH | original_glszm_SmallAreaHighGrayLevelEmphasis |
| original_glszm_GrayLevelNonUniformity |
| original_glcm_Imc1 |
| original_glrlm_ShortRunEmphasis |
| original_glszm_GrayLevelNonUniformityNormalized |
| original_glcm_DifferenceEntropy |
| original_firstorder_Mean |
| original_glszm_SmallAreaLowGrayLevelEmphasis |
| original_firstorder_Variance |
| original_firstorder_Median |

**Table S2.** Top ten selected features for the Pitt dataset and NIH dataset, with the Top 5 selected features listed in the first 5 rows for each dataset. GLSZM = gray level size zone matrix, GLRLM = gray level run length matrix, GLDM = gray level dependence matrix, GLCM = gray level co-occurrence matrix.

| **Pitt, top 10 features** | Training dataset (LOO) | | | | Validation dataset | | | |
| --- | --- | --- | --- | --- | --- | --- | --- | --- |
| Lesion type | SVM | LDA | RF | ADA-boost | SVM | LDA | RF | ADA-boost |
| Type I | 0.75 | 0.74 | 0.71 | 0.68 | 0.53 | 0.52 | 0.60 | 0.56 |
| Type II | 0.41 | 0.46 | 0.34 | 0.46 | 0.44 | 0.69 | 0.61 | 0.63 |
| Type IV | 0.76 | 0.77 | 0.79 | 0.81 | 0.97 | 0.91 | 0.89 | 0.80 |
| Average accuracy | 0.64 | 0.66 | 0.61 | 0.65 | 0.65 | 0.71 | 0.70 | 0.66 |
|  |  |  |  |  |  |  |  |  |
| **Pitt, top 5 features** | Training dataset (LOO) | | | | Validation dataset | | | |
| Lesion type | SVM | LDA | SVM | ADA-boost | SVM | LDA | SVM | ADA-boost |
| Type I | 0.71 | 0.71 | 0.66 | 0.64 | 0.56 | 0.53 | 0.56 | 0.67 |
| Type II | 0.43 | 0.39 | 0.31 | 0.45 | 0.69 | 0.67 | 0.55 | 0.58 |
| Type IV | 0.77 | 0.77 | 0.77 | 0.74 | 0.99 | 0.99 | 0.94 | 0.85 |
| Average accuracy | 0.64 | 0.62 | 0.58 | 0.61 | 0.75 | 0.73 | 0.68 | 0.70 |
|  |  |  |  |  |  |  |  |  |
| **NIH, top 10 features** | Training dataset (LOO) | | | | Validation dataset | | | |
| Lesion type | SVM | LDA | RF | ADA-boost | SVM | LDA | RF | ADA-boost |
| Type I | 0.46 | 0.59 | 0.65 | 0.74 | 0.52 | 0.55 | 0.49 | 0.47 |
| Type II | 0.47 | 0.5 | 0.65 | 0.75 | 0.48 | 0.56 | 0.46 | 0.58 |
| Type III | 0.68 | 0.71 | 0.69 | 0.67 | 0.74 | 0.69 | 0.68 | 0.70 |
| Type IV | 0.16 | 0.62 | 0.52 | 0.65 | 0.58 | 0.56 | 0.51 | 0.65 |
| Average accuracy | 0.44 | 0.61 | 0.63 | 0.70 | 0.58 | 0.59 | 0.54 | 0.60 |
|  |  |  |  |  |  |  |  |  |
| **NIH, top 5 features** | Training dataset (LOO) | | | | Validation dataset | | | |
| Lesion type | SVM | LDA | RF | ADA-boost | SVM | LDA | RF | ADA-boost |
| Type I | 0.29 | 0.58 | 0.59 | 0.63 | 0.44 | 0.62 | 0.48 | 0.62 |
| Type II | 0.08 | 0.50 | 0.67 | 0.63 | 0.48 | 0.49 | 0.47 | 0.65 |
| Type III | 0.73 | 0.72 | 0.71 | 0.63 | 0.72 | 0.73 | 0.64 | 0.64 |
| Type IV | 0.29 | 0.65 | 0.54 | 0.55 | 0.59 | 0.55 | 0.59 | 0.58 |
| Average accuracy | 0.35 | 0.61 | 0.63 | 0.61 | 0.56 | 0.60 | 0.55 | 0.62 |

**Table S3.** Model performance metrics; AUC values and average accuracy for the OvA classification method.

| **Pitt, top 10 features** | Training dataset (LOO) | | | | Validation dataset | | | |
| --- | --- | --- | --- | --- | --- | --- | --- | --- |
| Lesion type | SVM | LDA | RF | ADA-boost | SVM | LDA | RF | ADA-boost |
| Type I | 0.72 | 0.71 | 0.68 | 0.57 | 0.57 | 0.57 | 0.56 | 0.26 |
| Type II | 0.41 | 0.55 | 0.45 | 0.52 | 0.81 | 0.52 | 0.64 | 0.75 |
| Type IV | 0.79 | 0.79 | 0.77 | 0.74 | 0.96 | 0.92 | 0.87 | 0.80 |
| Average accuracy | 0.64 | 0.68 | 0.63 | 0.61 | 0.78 | 0.67 | 0.69 | 0.60 |
|  |  |  |  |  |  |  |  |  |
| **Pitt, top 5 features** | Training dataset (LOO) | | | | Validation dataset | | | |
| Lesion type | SVM | LDA | SVM | ADA-boost | SVM | LDA | SVM | ADA-boost |
| Type I | 0.72 | 0.74 | 0.70 | 0.59 | 0.53 | 0.55 | 0.48 | 0.55 |
| Type II | 0.42 | 0.53 | 0.47 | 0.53 | 0.85 | 0.50 | 0.52 | 0.63 |
| Type IV | 0.78 | 0.79 | 0.78 | 0.68 | 0.99 | 0.99 | 0.91 | 0.92 |
| Average accuracy | 0.64 | 0.69 | 0.65 | 0.60 | 0.79 | 0.68 | 0.64 | 0.70 |
|  |  |  |  |  |  |  |  |  |
| **NIH, top 10 features** | Training dataset (LOO) | | | | Validation dataset | | | |
| Lesion type | SVM | LDA | RF | ADA-boost | SVM | LDA | RF | ADA-boost |
| Type I | 0.67 | 0.72 | 0.64 | 0.54 | 0.52 | 0.54 | 0.50 | 0.48 |
| Type II | 0.49 | 0.58 | 0.67 | 0.58 | 0.57 | 0.60 | 0.50 | 0.50 |
| Type III | 0.73 | 0.71 | 0.69 | 0.68 | 0.74 | 0.63 | 0.68 | 0.67 |
| Type IV | 0.65 | 0.53 | 0.63 | 0.57 | 0.57 | 0.58 | 0.56 | 0.55 |
| Average accuracy | 0.64 | 0.64 | 0.66 | 0.59 | 0.60 | 0.59 | 0.56 | 0.55 |
|  |  |  |  |  |  |  |  |  |
| **NIH, top 5 features** | Training dataset (LOO) | | | | Validation dataset | | | |
| Lesion type | SVM | LDA | RF | ADA-boost | SVM | LDA | RF | ADA-boost |
| Type I | 0.66 | 0.62 | 0.72 | 0.55 | 0.54 | 0.62 | 0.62 | 0.47 |
| Type II | 0.60 | 0.60 | 0.58 | 0.67 | 0.54 | 0.54 | 0.52 | 0.44 |
| Type III | 0.74 | 0.72 | 0.74 | 0.69 | 0.73 | 0.69 | 0.62 | 0.66 |
| Type IV | 0.68 | 0.63 | 0.68 | 0.61 | 0.57 | 0.57 | 0.60 | 0.54 |
| Average accuracy | 0.67 | 0.64 | 0.68 | 0.63 | 0.60 | 0.61 | 0.59 | 0.53 |

**Table S4.** Model performance metrics; AUC values and average accuracy for the MC classification method.

| **Model** |  | Training dataset (LOO) | | | Validation dataset | | |
| --- | --- | --- | --- | --- | --- | --- | --- |
| Ada-Boost |  | Predicted Lesion Type | | | Predicted Lesion Type | | |
|  |  | Type I | Type II | Type IV | Type I | Type II | Type IV |
| True Lesion Type | Type I | 40 | 11 | 9 | 13 | 2 | 1 |
| Type II | 10 | 6 | 6 | 4 | 3 | 0 |
| Type IV | 6 | 10 | 25 | 1 | 1 | 2 |
|  | Accuracy |  | 57.72 |  |  | 66.67 |  |
|  | Balanced Accuracy | | 51.64 |  |  | 58.04 |  |
|  |  |  |  |  |  |  |  |
| LDA |  | Predicted Lesion Type | | | Predicted Lesion Type | | |
|  |  | Type I | Type II | Type IV | Type I | Type II | Type IV |
| True Lesion Type | Type I | 50 | 1 | 9 | 8 | 7 | 1 |
| Type II | 15 | 2 | 5 | 4 | 3 | 0 |
| Type IV | 11 | 3 | 27 | 0 | 2 | 2 |
|  | Accuracy |  | 64.23 |  |  | 48.15 |  |
|  | Balanced Accuracy | | 52.76 |  |  | 47.62 |  |
|  |  |  | | |  | | |
| RF |  | Predicted Lesion Type | | | Predicted Lesion Type | | |
|  |  | Type I | Type II | Type IV | Type I | Type II | Type IV |
| True Lesion Type | Type I | 48 | 1 | 11 | 13 | 3 | 0 |
| Type II | 15 | 1 | 6 | 4 | 3 | 0 |
| Type IV | 13 | 3 | 25 | 1 | 1 | 2 |
|  | Accuracy |  | 60.16 |  |  | 66.67 |  |
|  | Balanced Accuracy | | 48.51 |  |  | 58.04 |  |
|  |  |  |  |  |  |  |  |
| SVM |  | Predicted Lesion Type | | | Predicted Lesion Type | | |
|  |  | Type I | Type II | Type IV | Type I | Type II | Type IV |
| True Lesion Type | Type I | 50 | 0 | 10 | 11 | 4 | 1 |
| Type II | 18 | 0 | 4 | 6 | 1 | 0 |
| Type IV | 15 | 0 | 26 | 0 | 1 | 3 |
|  | Accuracy |  | 61.79 |  |  | 55.56 |  |
|  | Balanced Accuracy | | 48.92 |  |  | 52.68 |  |

**Table S5.** Model contingency tables and accuracies for the Pitt training dataset, using the OvA classification approach and the top 10 selected features.

| **Model** |  | Training dataset (LOO) | | | Validation dataset | | |
| --- | --- | --- | --- | --- | --- | --- | --- |
| Ada-Boost |  | Predicted Lesion Type | | | Predicted Lesion Type | | |
|  |  | Type I | Type II | Type IV | Type I | Type II | Type IV |
| True Lesion Type | Type I | 40 | 13 | 7 | 8 | 5 | 3 |
| Type II | 11 | 2 | 9 | 4 | 3 | 0 |
| Type IV | 12 | 7 | 22 | 1 | 1 | 2 |
|  | Accuracy |  | 52.03 |  |  | 48.15 |  |
|  | Balanced Accuracy | | 43.14 |  |  | 47.62 |  |
|  |  |  |  |  |  |  |  |
| LDA |  | Predicted Lesion Type | | | Predicted Lesion Type | | |
|  |  | Type I | Type II | Type IV | Type I | Type II | Type IV |
| True Lesion Type | Type I | 46 | 0 | 14 | 8 | 7 | 1 |
| Type II | 15 | 0 | 7 | 5 | 2 | 0 |
| Type IV | 13 | 0 | 28 | 0 | 1 | 3 |
|  | Accuracy |  | 60.16 |  |  | 48.15 |  |
|  | Balanced Accuracy | | 48.31 |  |  | 51.19 |  |
|  |  |  | | |  | | |
| RF |  | Predicted Lesion Type | | | Predicted Lesion Type | | |
|  |  | Type I | Type II | Type IV | Type I | Type II | Type IV |
| True Lesion Type | Type I | 47 | 2 | 11 | 10 | 5 | 1 |
| Type II | 15 | 1 | 6 | 5 | 2 | 0 |
| Type IV | 15 | 2 | 24 | 1 | 0 | 3 |
|  | Accuracy |  | 58.54 |  |  | 55.56 |  |
|  | Balanced Accuracy | | 47.14 |  |  | 55.36 |  |
|  |  |  |  |  |  |  |  |
| SVM |  | Predicted Lesion Type | | | Predicted Lesion Type | | |
|  |  | Type I | Type II | Type IV | Type I | Type II | Type IV |
| True Lesion Type | Type I | 49 | 0 | 11 | 15 | 0 | 1 |
| Type II | 15 | 0 | 7 | 7 | 0 | 0 |
| Type IV | 16 | 0 | 25 | 0 | 0 | 4 |
|  | Accuracy |  | 60.16 |  |  | 70.37 |  |
|  | Balanced Accuracy | | 47.55 |  |  | 64.58 |  |

**Table S6.** Model contingency tables and accuracies for the Pitt training dataset, using the OvA classification approach and the top 5 selected features.

| **Model** |  | Training dataset (LOO) | | | Validation dataset | | |
| --- | --- | --- | --- | --- | --- | --- | --- |
| Ada-Boost |  | Predicted Lesion Type | | | Predicted Lesion Type | | |
|  |  | Type I | Type II | Type IV | Type I | Type II | Type IV |
| True Lesion Type | Type I | 23 | 28 | 9 | 3 | 12 | 1 |
| Type II | 6 | 11 | 5 | 3 | 4 | 0 |
| Type IV | 16 | 3 | 22 | 2 | 1 | 1 |
|  | Accuracy |  | 45.53 |  |  | 29.63 |  |
|  | Balanced Accuracy | | 47.33 |  |  | 33.63 |  |
|  |  |  |  |  |  |  |  |
| LDA |  | Predicted Lesion Type | | | Predicted Lesion Type | | |
|  |  | Type I | Type II | Type IV | Type I | Type II | Type IV |
| True Lesion Type | Type I | 27 | 23 | 10 | 8 | 7 | 1 |
| Type II | 14 | 6 | 2 | 4 | 3 | 0 |
| Type IV | 5 | 11 | 25 | 0 | 2 | 2 |
|  | Accuracy |  | 47.15 |  |  | 48.15 |  |
|  | Balanced Accuracy | | 44.42 |  |  | 47.62 |  |
|  |  |  | | |  | | |
| RF |  | Predicted Lesion Type | | | Predicted Lesion Type | | |
|  |  | Type I | Type II | Type IV | Type I | Type II | Type IV |
| True Lesion Type | Type I | 38 | 11 | 11 | 12 | 2 | 2 |
| Type II | 13 | 3 | 6 | 4 | 3 | 0 |
| Type IV | 10 | 6 | 25 | 1 | 1 | 2 |
|  | Accuracy |  | 53.66 |  |  | 62.96 |  |
|  | Balanced Accuracy | | 45.98 |  |  | 55.95 |  |
|  |  |  |  |  |  |  |  |
| SVM |  | Predicted Lesion Type | | | Predicted Lesion Type | | |
|  |  | Type I | Type II | Type IV | Type I | Type II | Type IV |
| True Lesion Type | Type I | 29 | 20 | 11 | 10 | 5 | 1 |
| Type II | 13 | 3 | 6 | 5 | 2 | 0 |
| Type IV | 7 | 11 | 23 | 0 | 1 | 3 |
|  | Accuracy |  | 44.72 |  |  | 55.56 |  |
|  | Balanced Accuracy | | 39.36 |  |  | 55.36 |  |

**Table S7.** Model contingency tables and accuracies for the Pitt training dataset, using the MC classification approach and the top 10 selected features.

| **Model** |  | Training dataset (LOO) | | | Validation dataset | | |
| --- | --- | --- | --- | --- | --- | --- | --- |
| Ada-Boost |  | Predicted Lesion Type | | | Predicted Lesion Type | | |
|  |  | Type I | Type II | Type IV | Type I | Type II | Type IV |
| True Lesion Type | Type I | 31 | 20 | 9 | 6 | 9 | 1 |
| Type II | 10 | 4 | 8 | 4 | 3 | 0 |
| Type IV | 11 | 9 | 21 | 1 | 1 | 2 |
|  | Accuracy |  | 45.53 |  |  | 40.74 |  |
|  | Balanced Accuracy | | 40.36 |  |  | 43.45 |  |
|  |  |  |  |  |  |  |  |
| LDA |  | Predicted Lesion Type | | | Predicted Lesion Type | | |
|  |  | Type I | Type II | Type IV | Type I | Type II | Type IV |
| True Lesion Type | Type I | 30 | 21 | 9 | 7 | 8 | 1 |
| Type II | 9 | 8 | 5 | 5 | 2 | 0 |
| Type IV | 5 | 11 | 25 | 0 | 1 | 3 |
|  | Accuracy |  | 51.22 |  |  | 44.44 |  |
|  | Balanced Accuracy | | 49.11 |  |  | 49.11 |  |
|  |  |  | | |  | | |
| RF |  | Predicted Lesion Type | | | Predicted Lesion Type | | |
|  |  | Type I | Type II | Type IV | Type I | Type II | Type IV |
| True Lesion Type | Type I | 34 | 14 | 12 | 9 | 6 | 1 |
| Type II | 8 | 6 | 8 | 5 | 2 | 0 |
| Type IV | 8 | 6 | 27 | 1 | 0 | 3 |
|  | Accuracy |  | 54.47 |  |  | 51.85 |  |
|  | Balanced Accuracy | | 49.93 |  |  | 53.27 |  |
|  |  |  |  |  |  |  |  |
| SVM |  | Predicted Lesion Type | | | Predicted Lesion Type | | |
|  |  | Type I | Type II | Type IV | Type I | Type II | Type IV |
| True Lesion Type | Type I | 23 | 23 | 14 | 9 | 6 | 1 |
| Type II | 10 | 5 | 7 | 5 | 2 | 0 |
| Type IV | 3 | 10 | 28 | 0 | 1 | 3 |
|  | Accuracy |  | 45.53 |  |  | 51.85 |  |
|  | Balanced Accuracy | | 43.12 |  |  | 53.27 |  |

**Table S8.** Model contingency tables and accuracies for the Pitt training dataset, using the MC classification approach and the top 5 selected features.

| **Model** |  | Training dataset (LOO) | | | | Validation dataset | | | |
| --- | --- | --- | --- | --- | --- | --- | --- | --- | --- |
| Ada-Boost |  | Predicted Lesion Type | | | | Predicted Lesion Type | | | |
|  |  | I | II | III | IV | I | II | III | IV |
| True Lesion Type | Type I | 5 | 1 | 6 | 4 | 4 | 0 | 9 | 2 |
| Type II | 0 | 8 | 1 | 3 | 2 | 3 | 3 | 5 |
| Type III | 5 | 2 | 29 | 5 | 3 | 0 | 13 | 3 |
| Type IV | 2 | 3 | 7 | 0 | 2 | 1 | 9 | 6 |
|  | Accuracy |  | 51.85 |  |  |  | 40.00 |  |  |
|  | Balanced Accuracy | | 38.83 |  |  |  | 37.87 |  |  |
|  |  |  |  |  |  |  |  |  |  |
| LDA |  | Predicted Lesion Type | | | | Predicted Lesion Type | | | |
|  |  | I | II | III | IV | I | II | III | IV |
| True Lesion Type | Type I | 3 | 2 | 9 | 2 | 1 | 2 | 3 | 9 |
| Type II | 1 | 4 | 5 | 5 | 0 | 2 | 7 | 4 |
| Type III | 5 | 3 | 31 | 2 | 5 | 1 | 9 | 4 |
| Type IV | 3 | 0 | 5 | 4 | 5 | 3 | 4 | 6 |
|  | Accuracy |  | 50.00 |  |  |  | 27.69 |  |  |
|  | Balanced Accuracy | | 38.59 |  |  |  | 25.69 |  |  |
|  |  |  | | | |  | | | |
| RF |  | Predicted Lesion Type | | | | Predicted Lesion Type | | | |
|  |  | I | II | III | IV | I | II | III | IV |
| True Lesion Type | Type I | 6 | 0 | 9 | 1 | 2 | 3 | 7 | 3 |
| Type II | 0 | 6 | 6 | 3 | 2 | 3 | 5 | 3 |
| Type III | 4 | 3 | 30 | 4 | 4 | 1 | 10 | 4 |
| Type IV | 2 | 4 | 6 | 0 | 4 | 2 | 4 | 8 |
|  | Accuracy |  | 50.00 |  |  |  | 35.38 |  |  |
|  | Balanced Accuracy | | 37.67 |  |  |  | 33.37 |  |  |
|  |  |  |  |  |  |  |  |  |  |
| SVM |  | Predicted Lesion Type | | | | Predicted Lesion Type | | | |
|  |  | I | II | III | IV | I | II | III | IV |
| True Lesion Type | Type I | 0 | 0 | 16 | 0 | 1 | 3 | 6 | 5 |
| Type II | 0 | 0 | 15 | 0 | 0 | 3 | 7 | 3 |
| Type III | 2 | 1 | 38 | 0 | 2 | 1 | 12 | 4 |
| Type IV | 0 | 0 | 12 | 0 | 1 | 7 | 4 | 6 |
|  | Accuracy |  | 45.24 |  |  |  | 33.85 |  |  |
|  | Balanced Accuracy | | 23.17 |  |  |  | 31.56 |  |  |

**Table S9.** Model contingency tables and accuracies for the NIH training dataset, using the OvA classification approach and the top 10 selected features.

| **Model** |  | Training dataset (LOO) | | | | Validation dataset | | | |
| --- | --- | --- | --- | --- | --- | --- | --- | --- | --- |
| Ada-Boost |  | Predicted Lesion Type | | | | Predicted Lesion Type | | | |
|  |  | I | II | III | IV | I | II | III | IV |
| True Lesion Type | Type I | 3 | 3 | 5 | 5 | 4 | 2 | 8 | 1 |
| Type II | 3 | 4 | 5 | 3 | 2 | 3 | 5 | 3 |
| Type III | 7 | 3 | 27 | 4 | 6 | 0 | 12 | 1 |
| Type IV | 6 | 2 | 4 | 0 | 3 | 3 | 7 | 5 |
|  | Accuracy |  | 40.48 |  |  |  | 36.92 |  |  |
|  | Balanced Accuracy | | 27.82 |  |  |  | 35.17 |  |  |
|  |  |  |  |  |  |  |  |  |  |
| LDA |  | Predicted Lesion Type | | | | Predicted Lesion Type | | | |
|  |  | I | II | III | IV | I | II | III | IV |
| True Lesion Type | Type I | 2 | 4 | 9 | 1 | 4 | 0 | 3 | 8 |
| Type II | 3 | 3 | 8 | 1 | 1 | 2 | 6 | 4 |
| Type III | 5 | 2 | 33 | 1 | 1 | 2 | 11 | 5 |
| Type IV | 3 | 0 | 9 | 0 | 2 | 4 | 5 | 7 |
|  | Accuracy |  | 45.24 |  |  |  | 36.92 |  |  |
|  | Balanced Accuracy | | 28.25 |  |  |  | 34.71 |  |  |
|  |  |  | | | |  | | | |
| RF |  | Predicted Lesion Type | | | | Predicted Lesion Type | | | |
|  |  | I | II | III | IV | I | II | III | IV |
| True Lesion Type | Type I | 4 | 1 | 8 | 3 | 3 | 2 | 7 | 3 |
| Type II | 3 | 4 | 4 | 4 | 3 | 4 | 5 | 1 |
| Type III | 5 | 3 | 31 | 2 | 5 | 3 | 9 | 2 |
| Type IV | 3 | 3 | 6 | 0 | 0 | 4 | 9 | 5 |
|  | Accuracy |  | 46.43 |  |  |  | 32.31 |  |  |
|  | Balanced Accuracy | | 31.82 |  |  |  | 31.48 |  |  |
|  |  |  |  |  |  |  |  |  |  |
| SVM |  | Predicted Lesion Type | | | | Predicted Lesion Type | | | |
|  |  | I | II | III | IV | I | II | III | IV |
| True Lesion Type | Type I | 0 | 0 | 16 | 0 | 5 | 3 | 5 | 2 |
| Type II | 0 | 0 | 15 | 0 | 2 | 4 | 6 | 1 |
| Type III | 2 | 0 | 39 | 0 | 3 | 1 | 13 | 2 |
| Type IV | 0 | 0 | 12 | 0 | 5 | 4 | 8 | 1 |
|  | Accuracy |  | 46.43 |  |  |  | 35.38 |  |  |
|  | Balanced Accuracy | | 23.78 |  |  |  | 34.52 |  |  |

**Table S10.** Model contingency tables and accuracies for the NIH training dataset, using the OvA classification approach and the top 5 selected features.

| **Model** |  | Training dataset (LOO) | | | | Validation dataset | | | |
| --- | --- | --- | --- | --- | --- | --- | --- | --- | --- |
| Ada-Boost |  | Predicted Lesion Type | | | | Predicted Lesion Type | | | |
|  |  | I | II | III | IV | I | II | III | IV |
| True Lesion Type | Type I | 7 | 1 | 3 | 5 | 1 | 2 | 8 | 4 |
| Type II | 1 | 4 | 5 | 5 | 2 | 4 | 3 | 4 |
| Type III | 8 | 8 | 20 | 5 | 4 | 1 | 9 | 5 |
| Type IV | 6 | 3 | 1 | 2 | 7 | 4 | 3 | 4 |
|  | Accuracy |  | 39.29 |  |  |  | 27.69 |  |  |
|  | Balanced Accuracy | | 33.97 |  |  |  | 26.76 |  |  |
|  |  |  |  |  |  |  |  |  |  |
| LDA |  | Predicted Lesion Type | | | | Predicted Lesion Type | | | |
|  |  | I | II | III | IV | I | II | III | IV |
| True Lesion Type | Type I | 6 | 2 | 3 | 5 | 1 | 2 | 3 | 9 |
| Type II | 3 | 4 | 2 | 6 | 0 | 2 | 7 | 4 |
| Type III | 3 | 6 | 22 | 10 | 5 | 1 | 9 | 4 |
| Type IV | 6 | 3 | 1 | 2 | 5 | 3 | 4 | 6 |
|  | Accuracy |  | 40.48 |  |  |  | 27.69 |  |  |
|  | Balanced Accuracy | | 33.62 |  |  |  | 25.69 |  |  |
|  |  |  | | | |  | | | |
| RF |  | Predicted Lesion Type | | | | Predicted Lesion Type | | | |
|  |  | I | II | III | IV | I | II | III | IV |
| True Lesion Type | Type I | 3 | 0 | 6 | 7 | 1 | 2 | 6 | 6 |
| Type II | 2 | 6 | 4 | 3 | 3 | 3 | 5 | 2 |
| Type III | 5 | 7 | 24 | 5 | 3 | 1 | 11 | 4 |
| Type IV | 5 | 3 | 1 | 3 | 3 | 2 | 5 | 8 |
|  | Accuracy |  | 42.86 |  |  |  | 35.38 |  |  |
|  | Balanced Accuracy | | 35.57 |  |  |  | 33.02 |  |  |
|  |  |  |  |  |  |  |  |  |  |
| SVM |  | Predicted Lesion Type | | | | Predicted Lesion Type | | | |
|  |  | I | II | III | IV | I | II | III | IV |
| True Lesion Type | Type I | 9 | 1 | 2 | 4 | 4 | 0 | 4 | 7 |
| Type II | 6 | 2 | 3 | 4 | 4 | 0 | 5 | 4 |
| Type III | 4 | 5 | 22 | 10 | 2 | 0 | 12 | 5 |
| Type IV | 7 | 3 | 1 | 1 | 5 | 2 | 4 | 7 |
|  | Accuracy |  | 40.48 |  |  |  | 35.38 |  |  |
|  | Balanced Accuracy | | 32.89 |  |  |  | 32.18 |  |  |

**Table S11.** Model contingency tables and accuracies for the NIH training dataset, using the MC classification approach and the top 10 selected features.

| **Model** |  | Training dataset (LOO) | | | | Validation dataset | | | |
| --- | --- | --- | --- | --- | --- | --- | --- | --- | --- |
| Ada-Boost |  | Predicted Lesion Type | | | | Predicted Lesion Type | | | |
|  |  | I | II | III | IV | I | II | III | IV |
| True Lesion Type | Type I | 7 | 1 | 4 | 4 | 1 | 3 | 6 | 5 |
| Type II | 3 | 4 | 4 | 4 | 1 | 1 | 7 | 4 |
| Type III | 10 | 7 | 18 | 6 | 2 | 2 | 10 | 5 |
| Type IV | 7 | 2 | 1 | 2 | 4 | 5 | 5 | 4 |
|  | Accuracy |  | 36.90 |  |  |  | 24.62 |  |  |
|  | Balanced Accuracy | | 32.75 |  |  |  | 22.30 |  |  |
|  |  |  |  |  |  |  |  |  |  |
| LDA |  | Predicted Lesion Type | | | | Predicted Lesion Type | | | |
|  |  | I | II | III | IV | I | II | III | IV |
| True Lesion Type | Type I | 5 | 4 | 4 | 3 | 4 | 0 | 3 | 8 |
| Type II | 2 | 5 | 3 | 5 | 1 | 2 | 6 | 4 |
| Type III | 6 | 5 | 23 | 7 | 1 | 2 | 11 | 5 |
| Type IV | 4 | 5 | 1 | 2 | 2 | 4 | 4 | 8 |
|  | Accuracy |  | 41.67 |  |  |  | 38.46 |  |  |
|  | Balanced Accuracy | | 34.34 |  |  |  | 36.10 |  |  |
|  |  |  | | | |  | | | |
| RF |  | Predicted Lesion Type | | | | Predicted Lesion Type | | | |
|  |  | I | II | III | IV | I | II | III | IV |
| True Lesion Type | Type I | 5 | 1 | 5 | 5 | 3 | 2 | 8 | 2 |
| Type II | 3 | 5 | 3 | 4 | 2 | 4 | 6 | 1 |
| Type III | 5 | 5 | 25 | 6 | 4 | 5 | 9 | 1 |
| Type IV | 2 | 3 | 3 | 4 | 0 | 5 | 9 | 4 |
|  | Accuracy |  | 46.43 |  |  |  | 30.77 |  |  |
|  | Balanced Accuracy | | 39.72 |  |  |  | 30.09 |  |  |
|  |  |  |  |  |  |  |  |  |  |
| SVM |  | Predicted Lesion Type | | | | Predicted Lesion Type | | | |
|  |  | I | II | III | IV | I | II | III | IV |
| True Lesion Type | Type I | 6 | 1 | 5 | 4 | 1 | 1 | 5 | 8 |
| Type II | 3 | 4 | 4 | 4 | 1 | 2 | 5 | 5 |
| Type III | 5 | 6 | 22 | 8 | 2 | 0 | 11 | 6 |
| Type IV | 3 | 4 | 2 | 3 | 4 | 2 | 5 | 7 |
|  | Accuracy |  | 41.67 |  |  |  | 32.31 |  |  |
|  | Balanced Accuracy | | 35.71 |  |  |  | 29.71 |  |  |

**Table S12.** Model contingency tables and accuracies for the NIH training dataset, using the MC classification approach and the top 5 selected features.

##
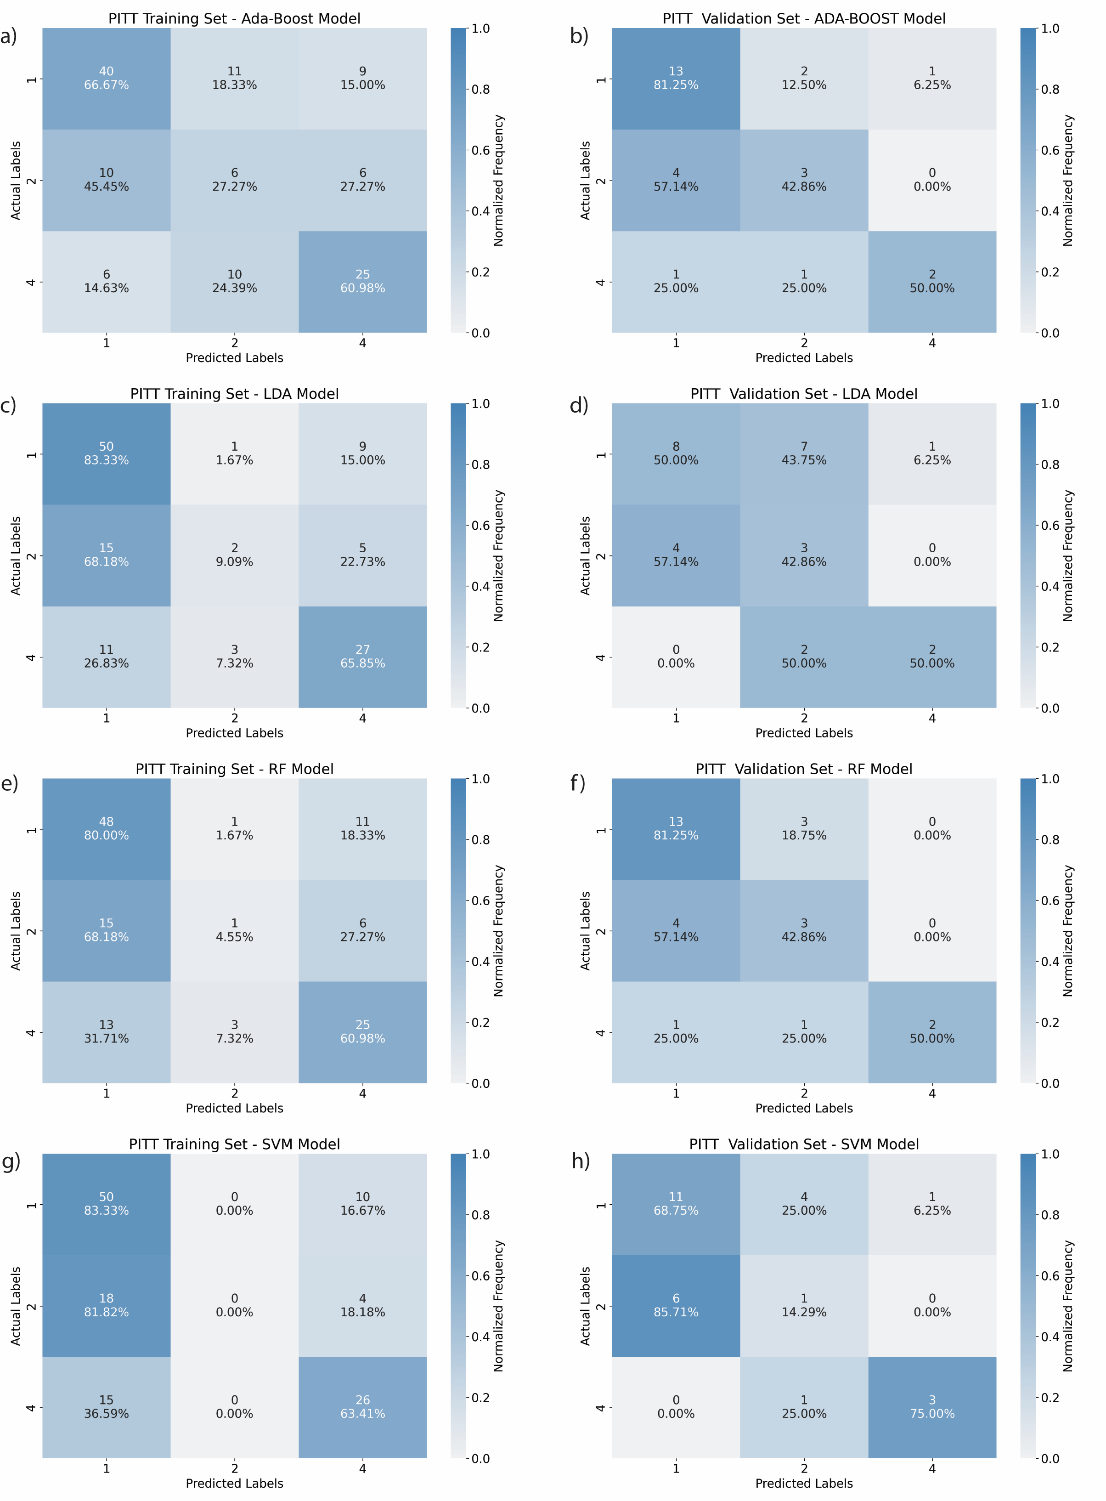


### **Figure S1.** Confusion matrices of model classification performance for the Pitt data, using a OvA classification approach and the top 10 selected features. Models evaluated for the training and validation sets, respectively, are (a, b) Ada-Boost, (c, d) LDA, (e, f) RF and (g, h) SVM.

###
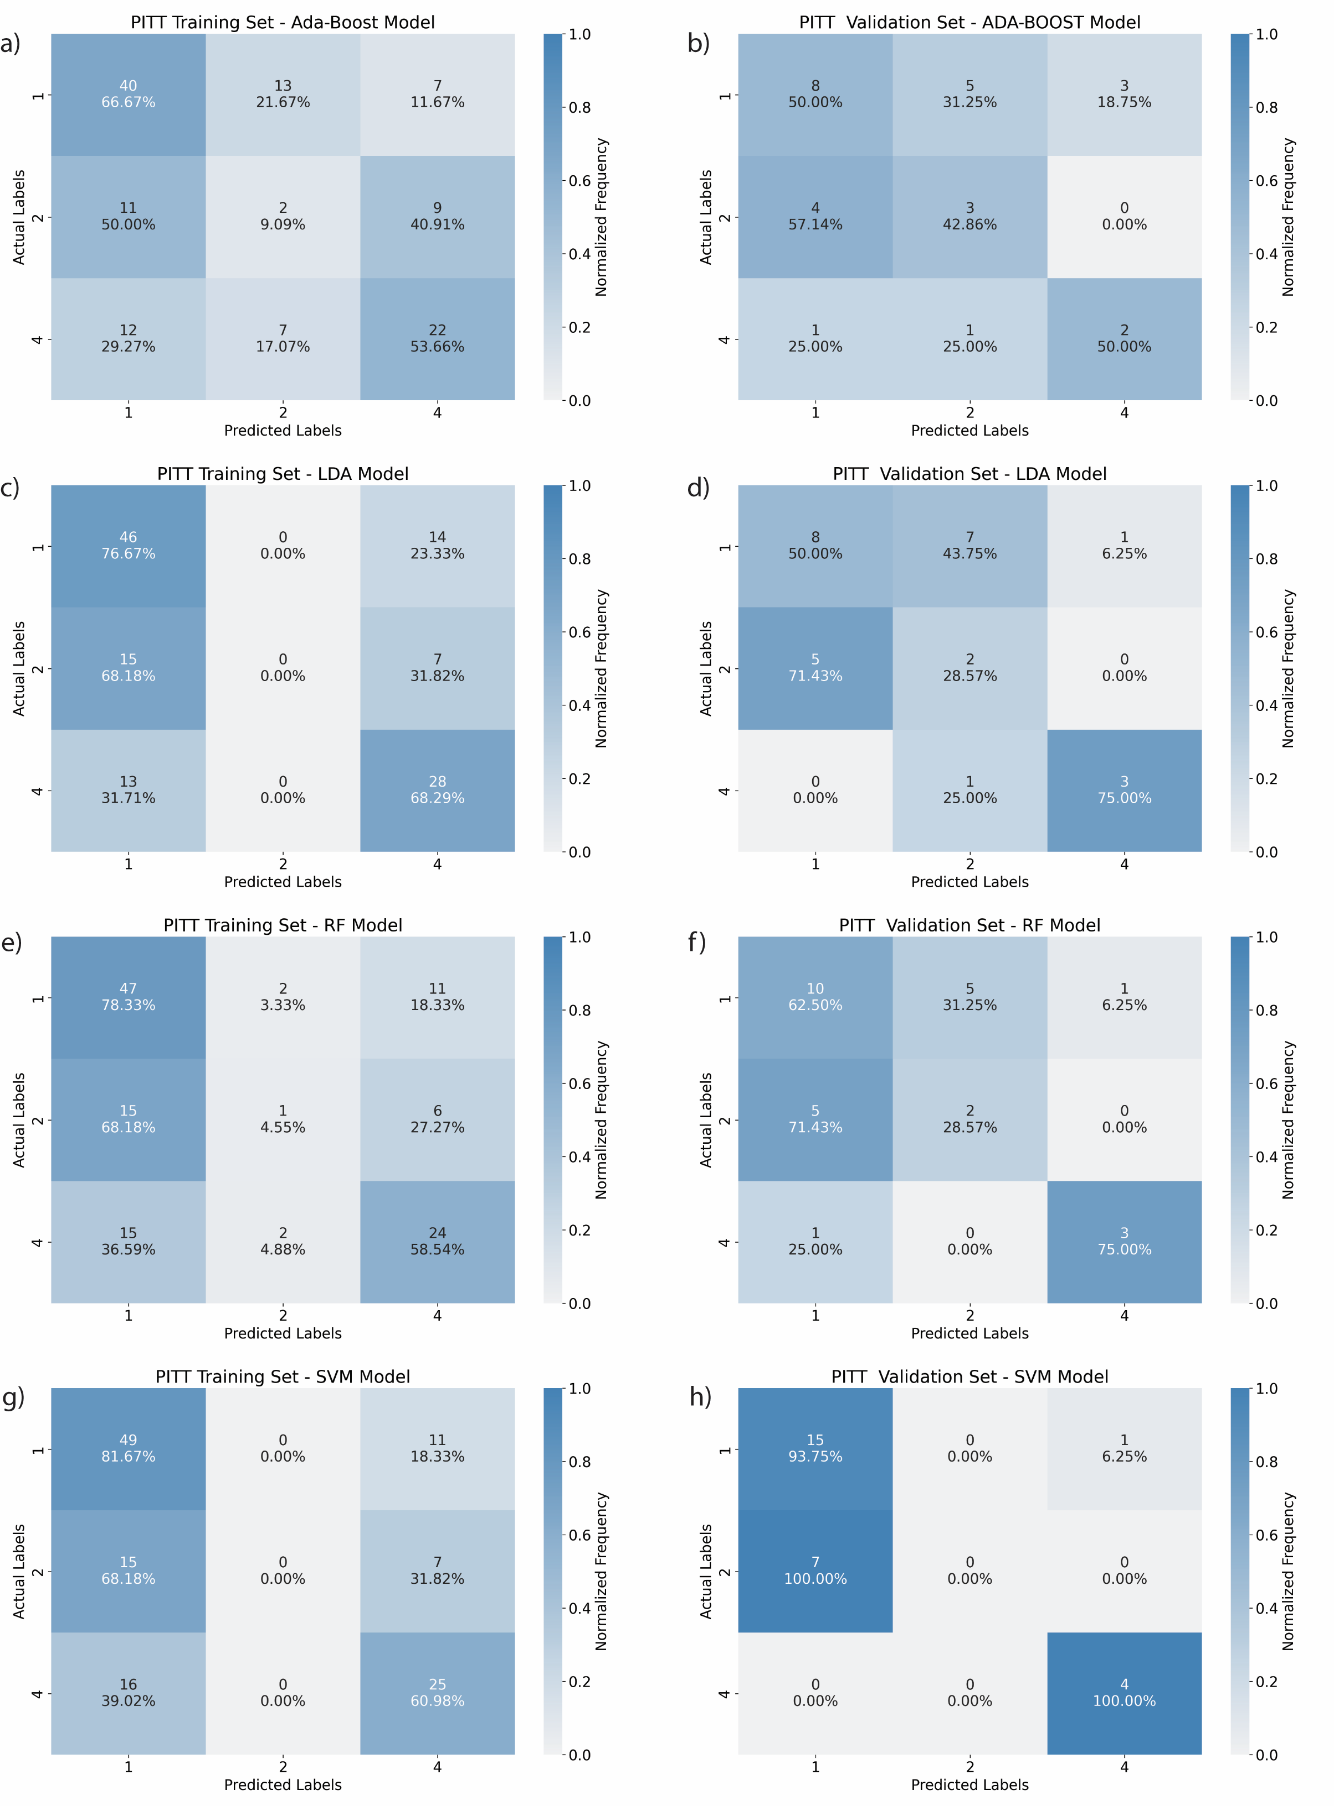


### **Figure S2.** Confusion matrices of model classification performance for the Pitt data, using a OvA classification approach and the top 5 selected features. Models evaluated for the training and validation sets, respectively, are (a, b) Ada-Boost, (c, d) LDA, (e, f) RF and (g, h) SVM.


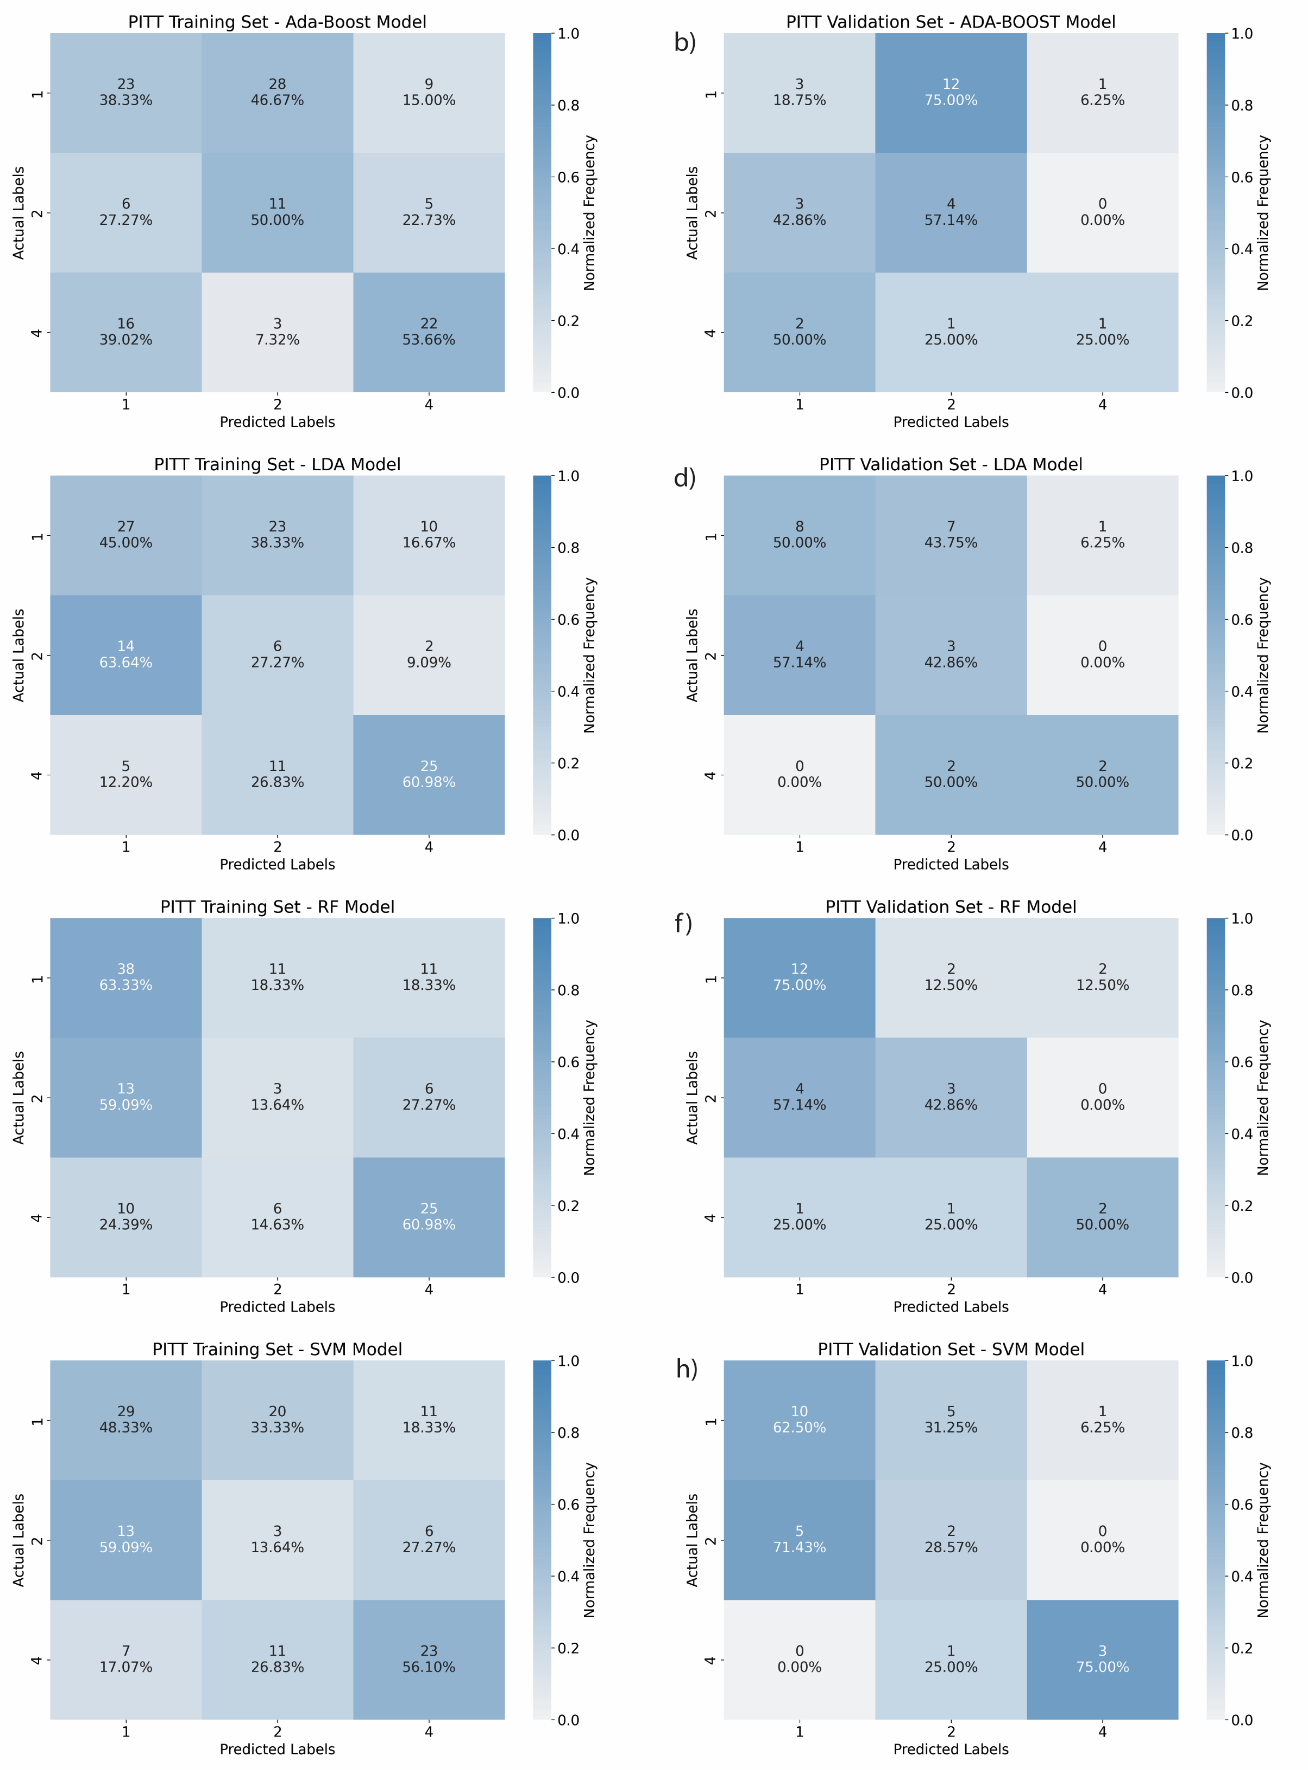


**Figure S3.** Confusion matrices of model classification performance for the Pitt data, using the MC approach and the top 10 selected features. Models evaluated for the training and test sets, respectively, are (a, b) Ada-Boost, (c, d) LDA, (e, f) RF and (g, h) SVM.


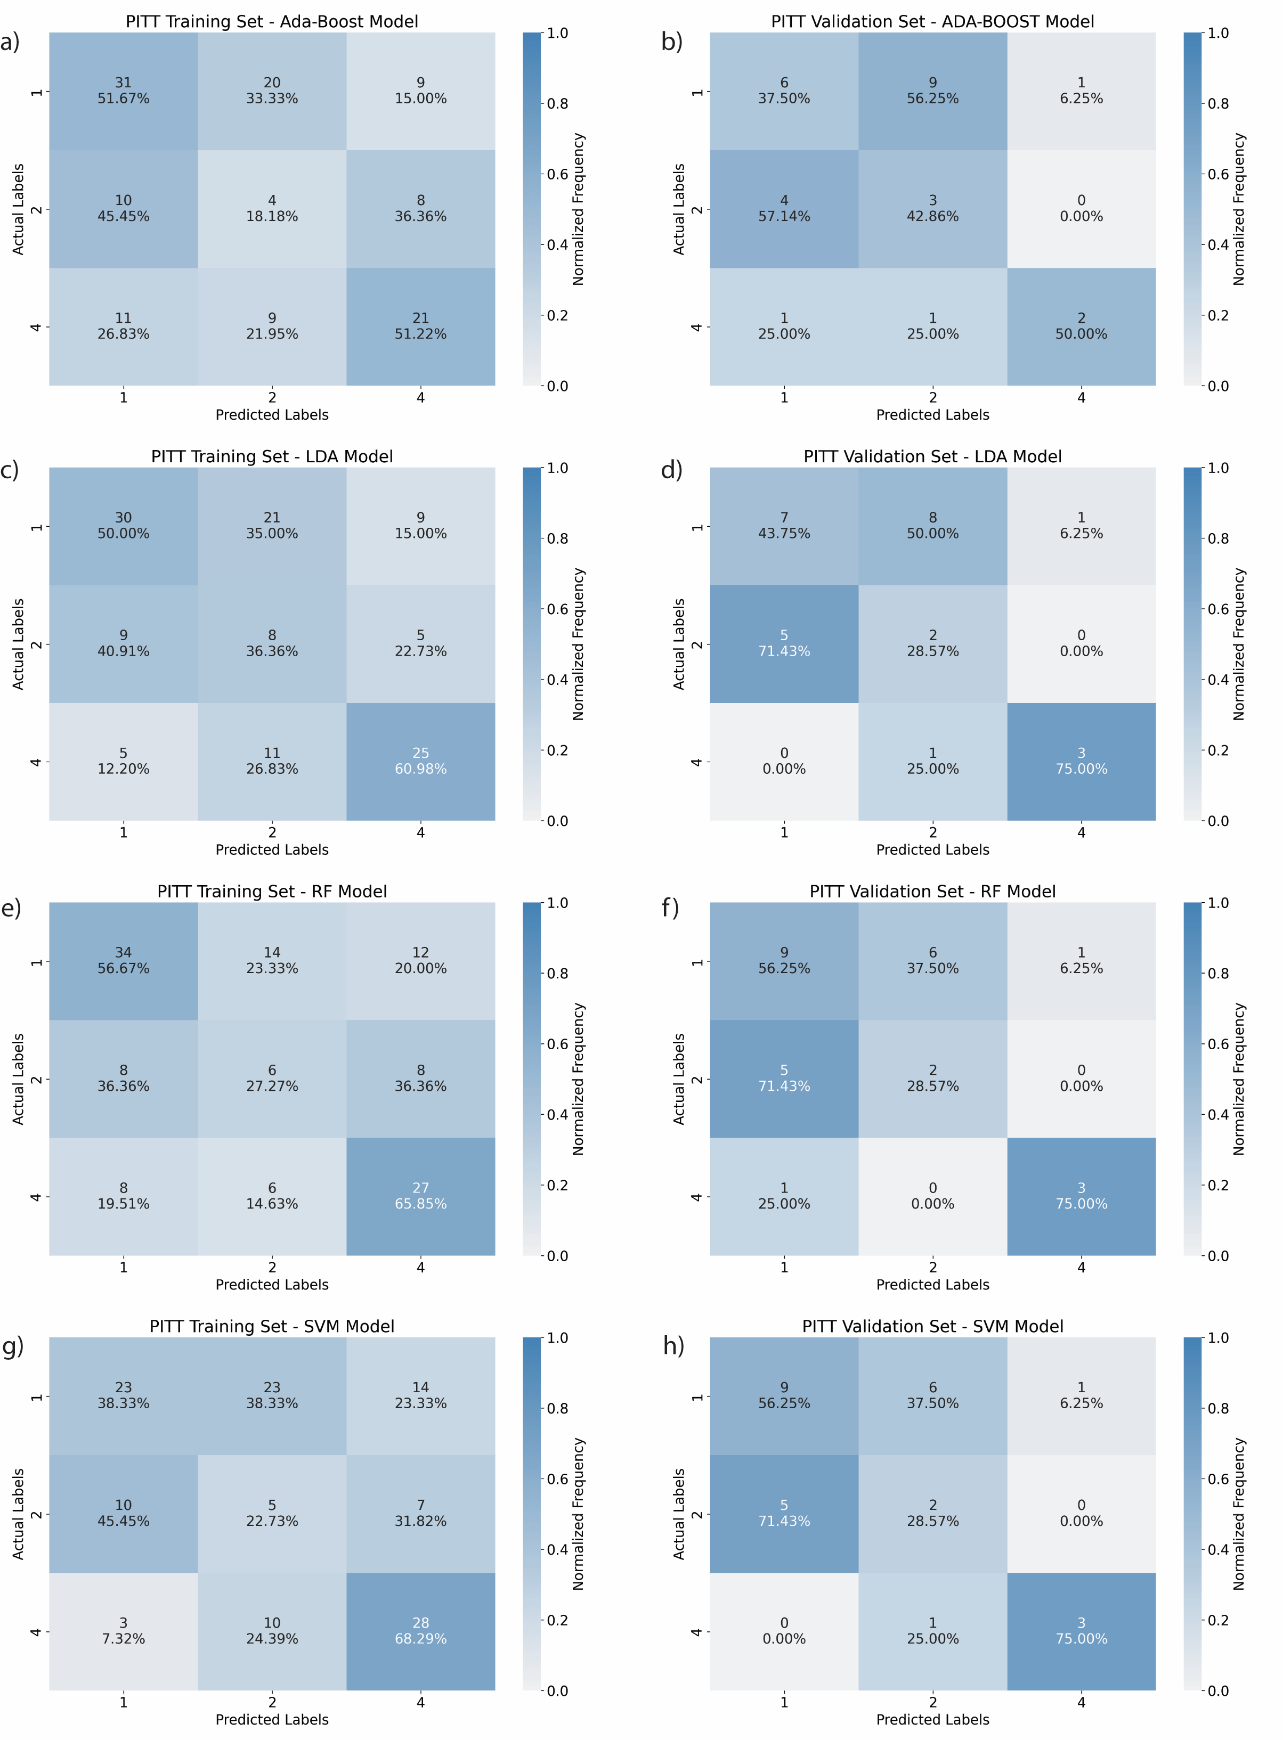


**Figure S4.** Confusion matrices of model classification performance for the Pitt data, using the MC approach and the top 5 selected features. Models evaluated for the training and test sets, respectively, are (a, b) Ada-Boost, (c, d) LDA, (e, f) RF and (g, h) SVM.


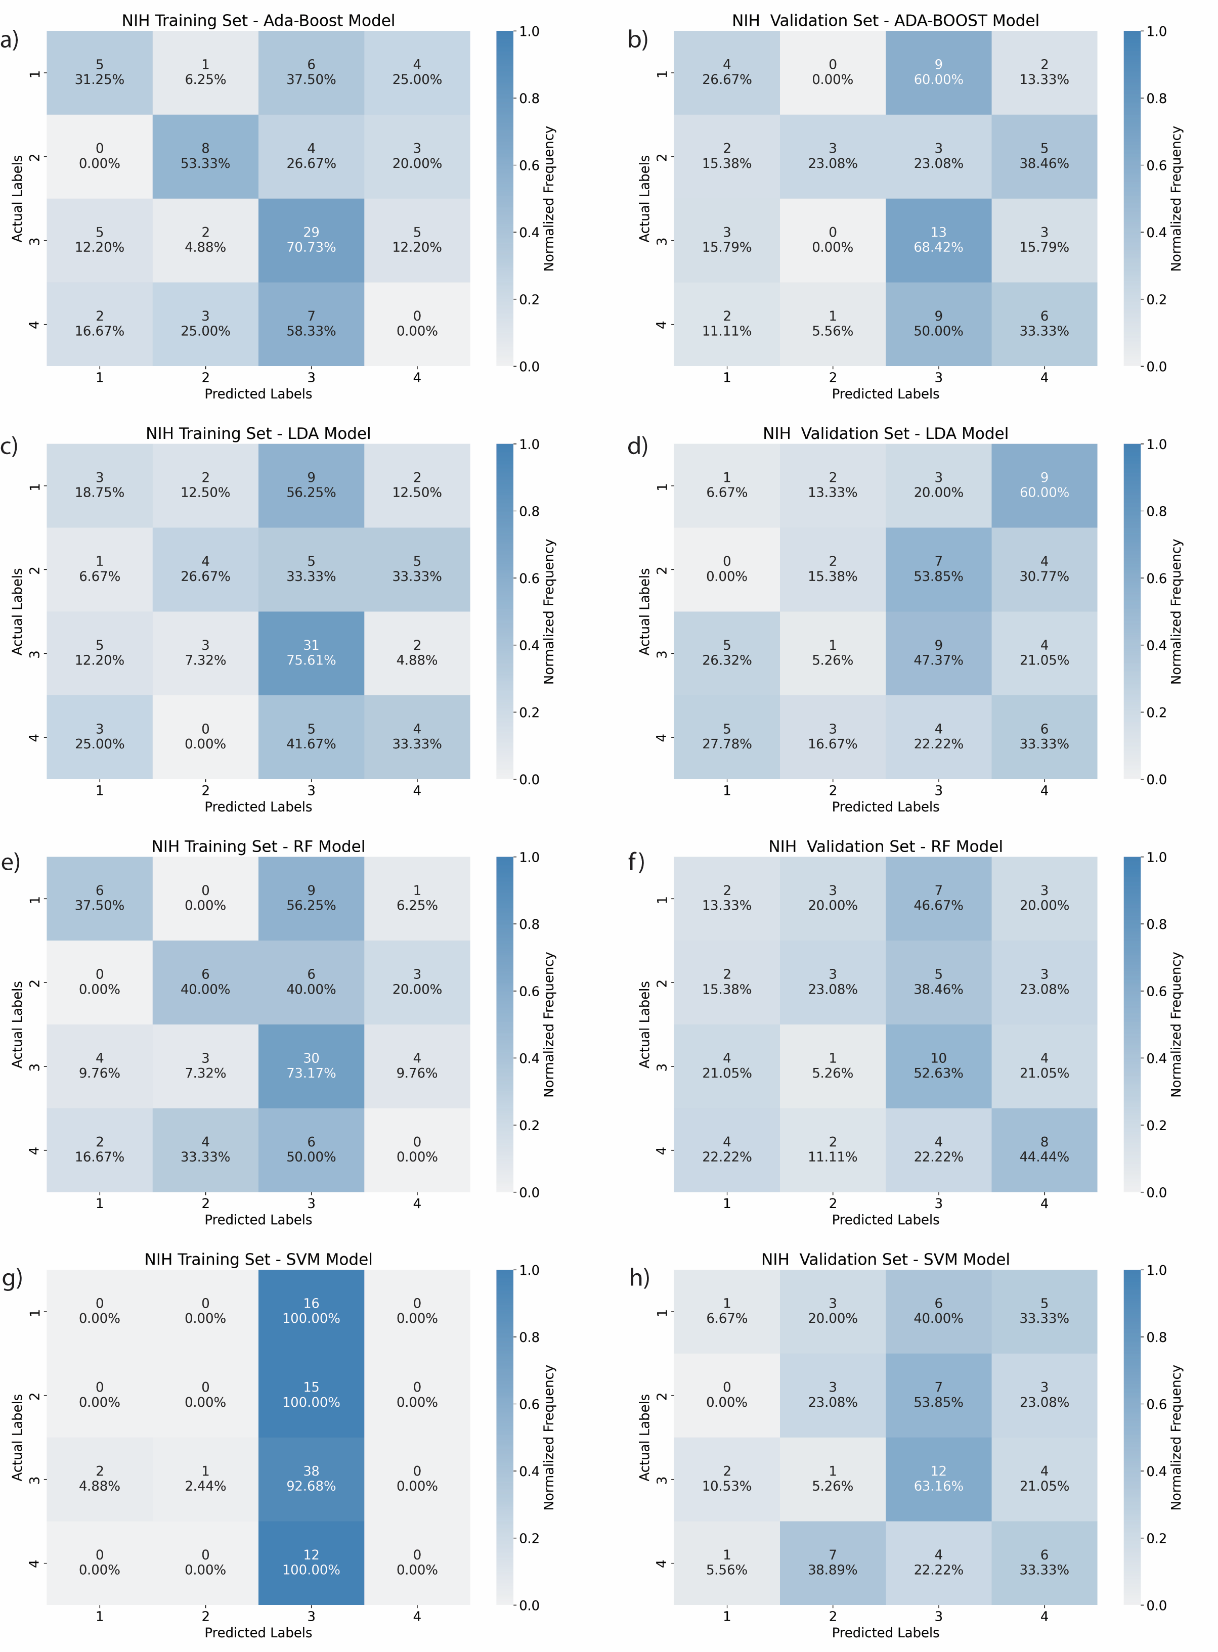


### **Figure S5.** Confusion matrices of model classification performance for the NIH data, using a OvA classification approach and the top 10 selected features. Models evaluated for the training and test sets, respectively, are (a, b) Ada-Boost, (c, d) LDA, (e, f) RF and (g, h) SVM.


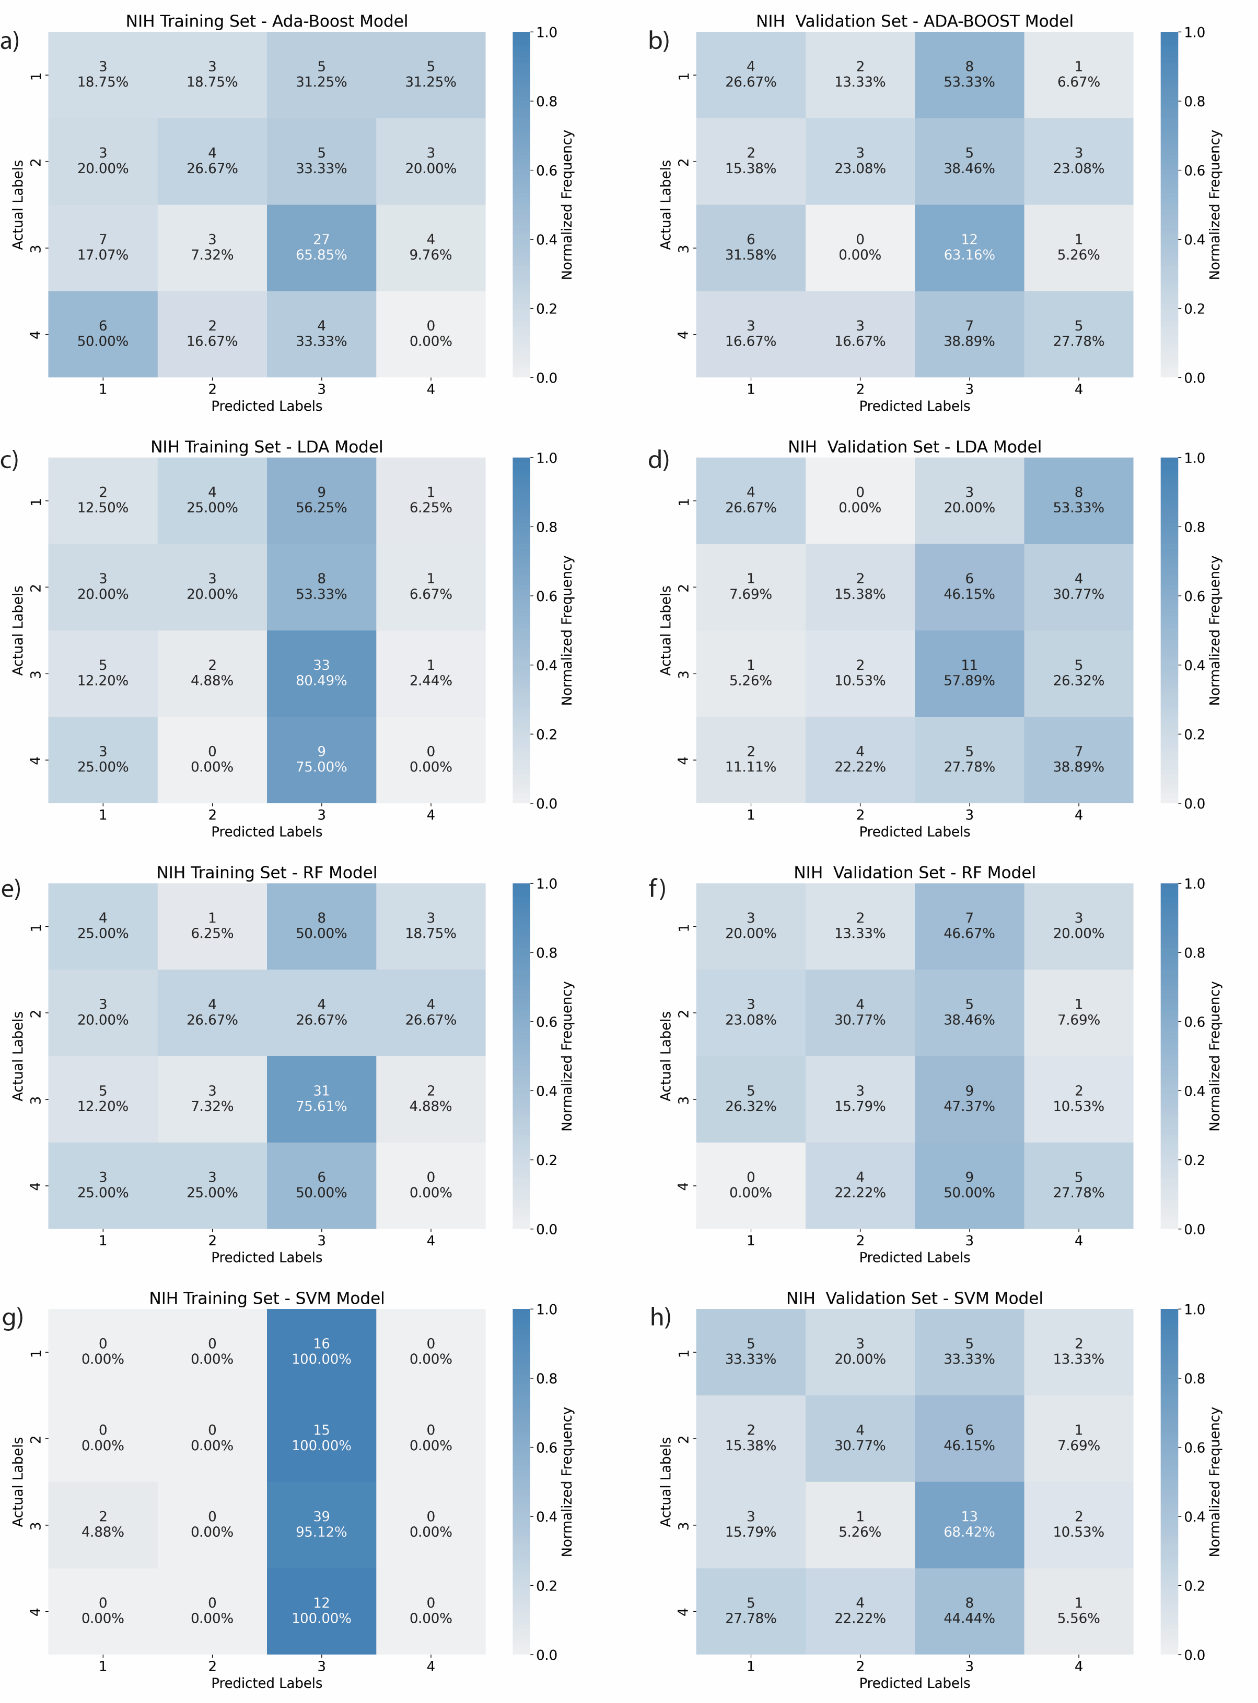


**Figure S6.** Confusion matrices of model classification performance for the NIH data, using a OvA classification approach and the top 5 selected features. Models evaluated for the training and test sets, respectively, are (a, b) Ada-Boost, (c, d) LDA, (e, f) RF and (g, h) SVM.


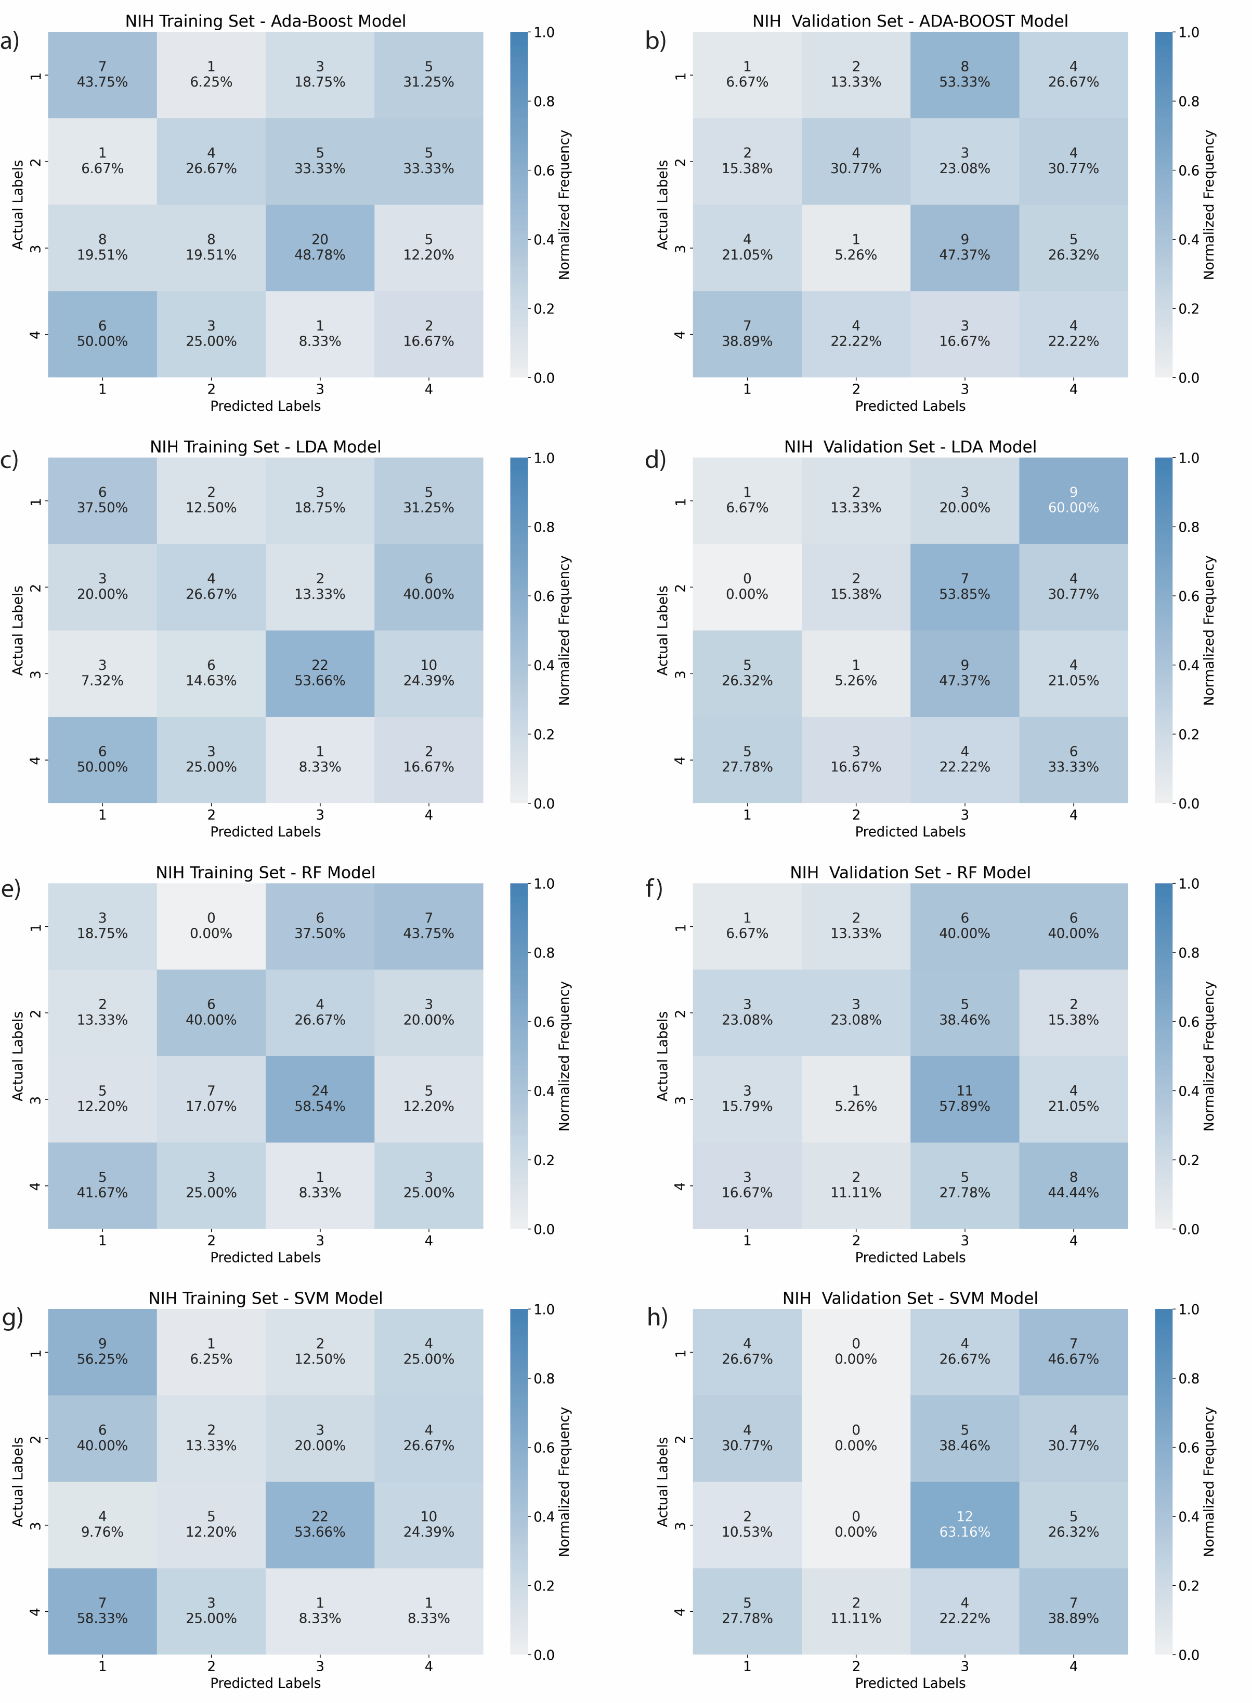


**Figure S7.** Confusion matrices of model classification performance for the NIH data, using the MC approach and the top 10 selected features. Models evaluated for the training and test sets, respectively, are (a, b) Ada-Boost, (c, d) LDA, (e, f) RF and (g, h) SVM.


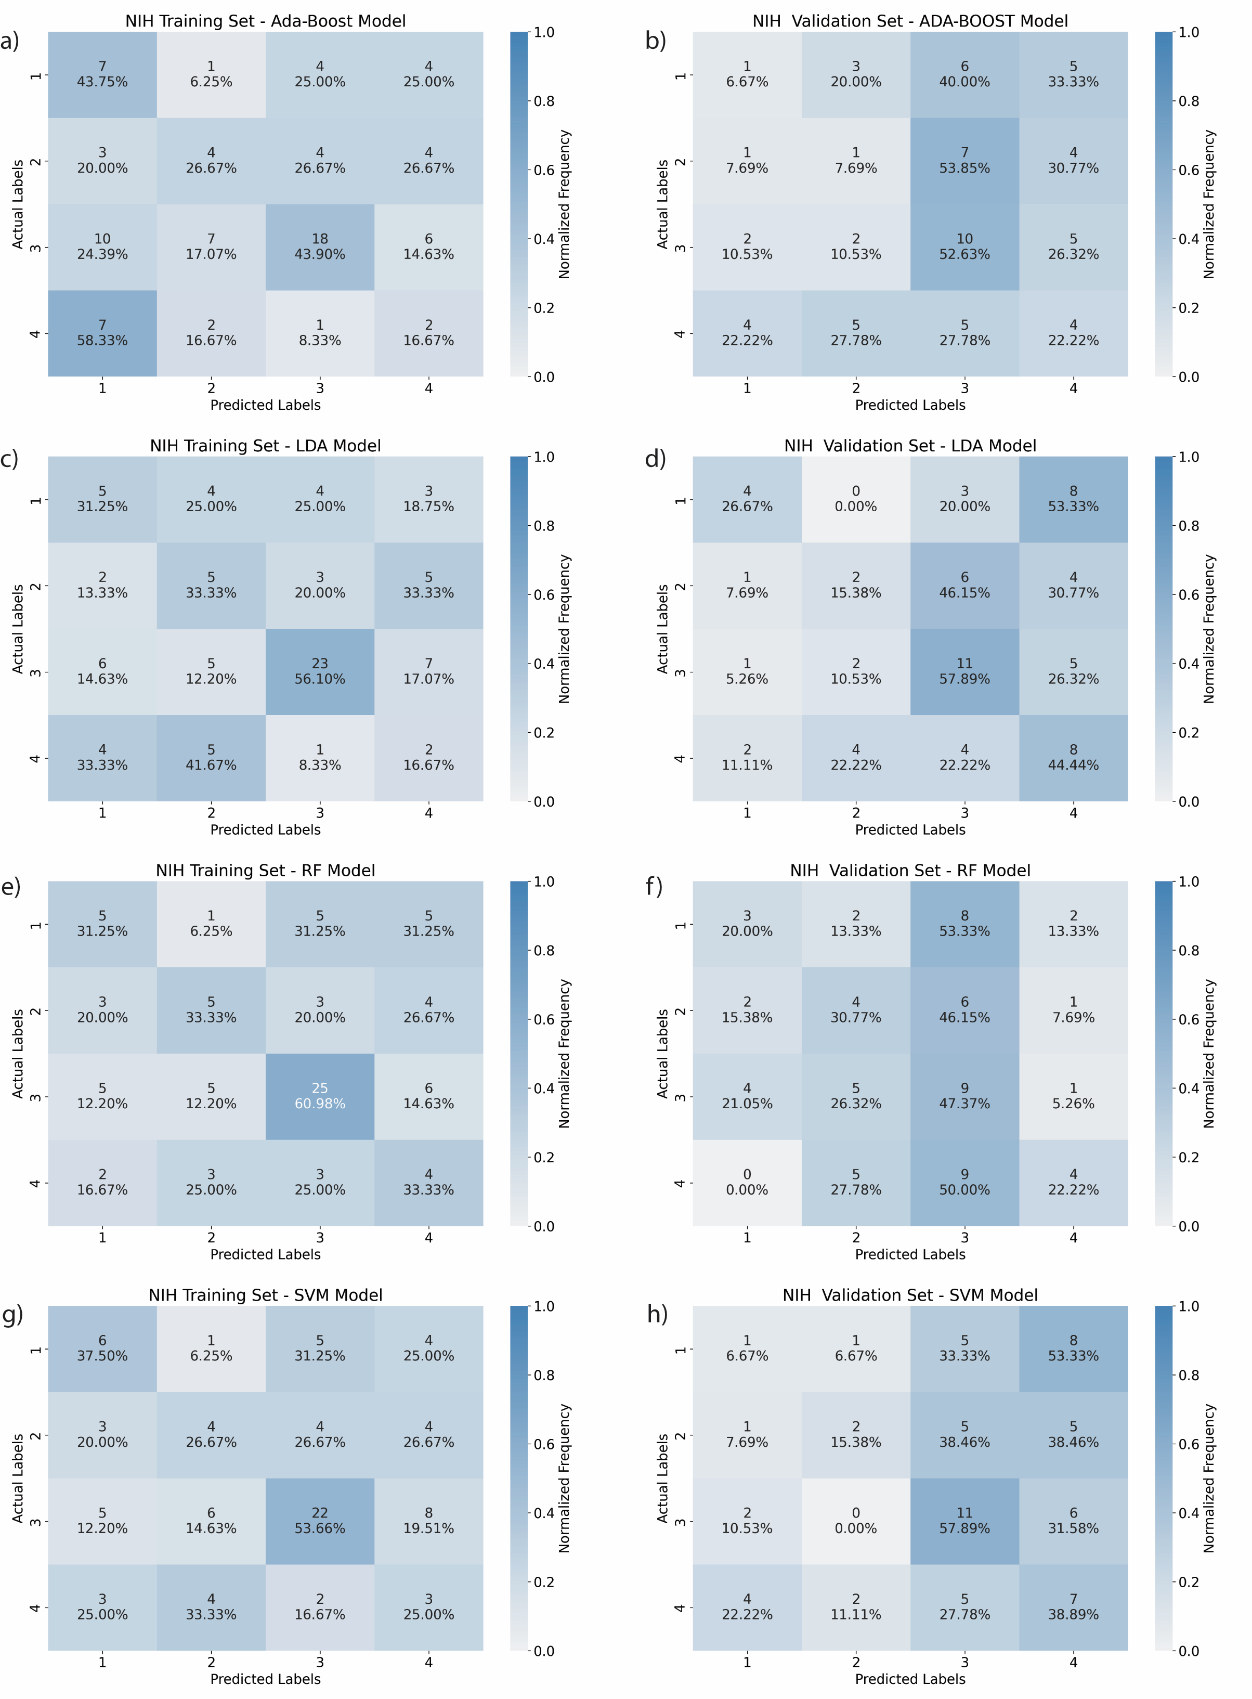


**Figure S8.** Confusion matrices of model classification performance for the NIH data, using the MC approach and the top 5 selected features. Models evaluated for the training and test sets, respectively, are (a, b) Ada-Boost, (c, d) LDA, (e, f) RF and (g, h) SVM.


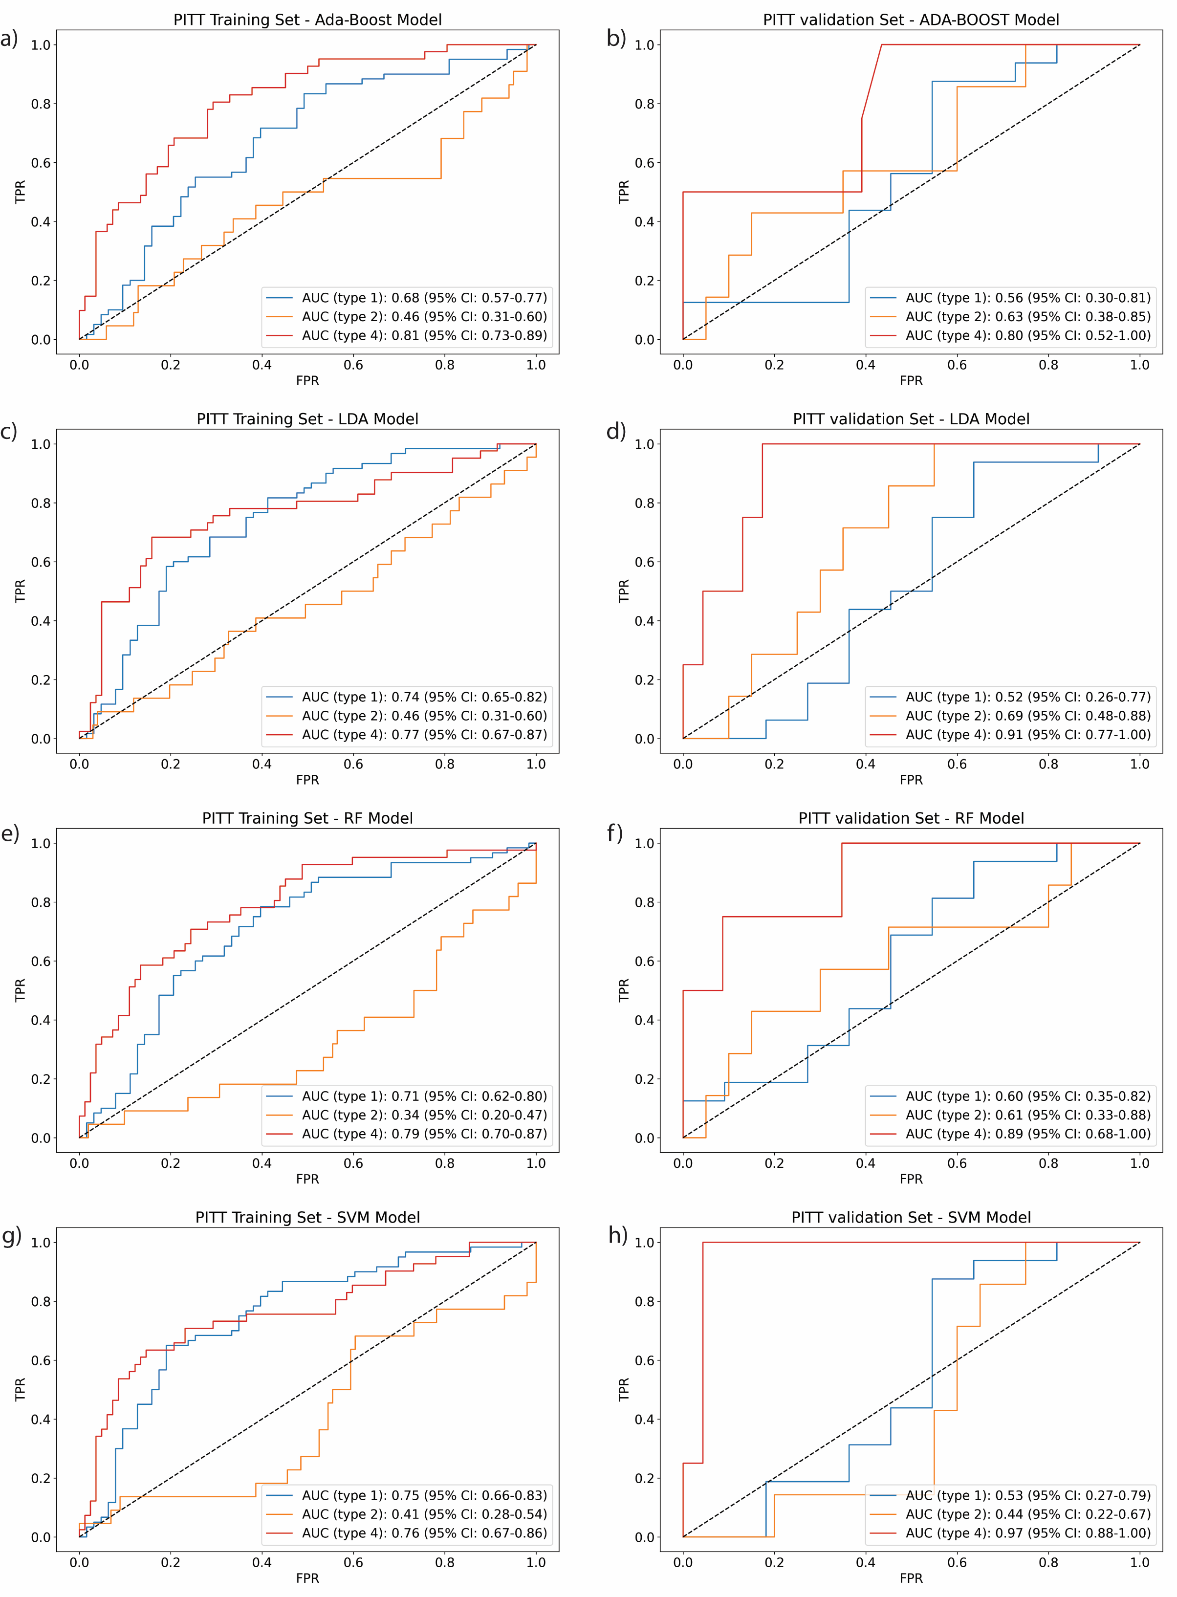


**Figure S9.** ROC plots and AUC values for model performance for the Pitt data, using the OvA approach and the top 10 features. Models evaluated are (a, b) Ada-Boost, (c, d) LDA, (e, f) RF and (g, h) SVM.


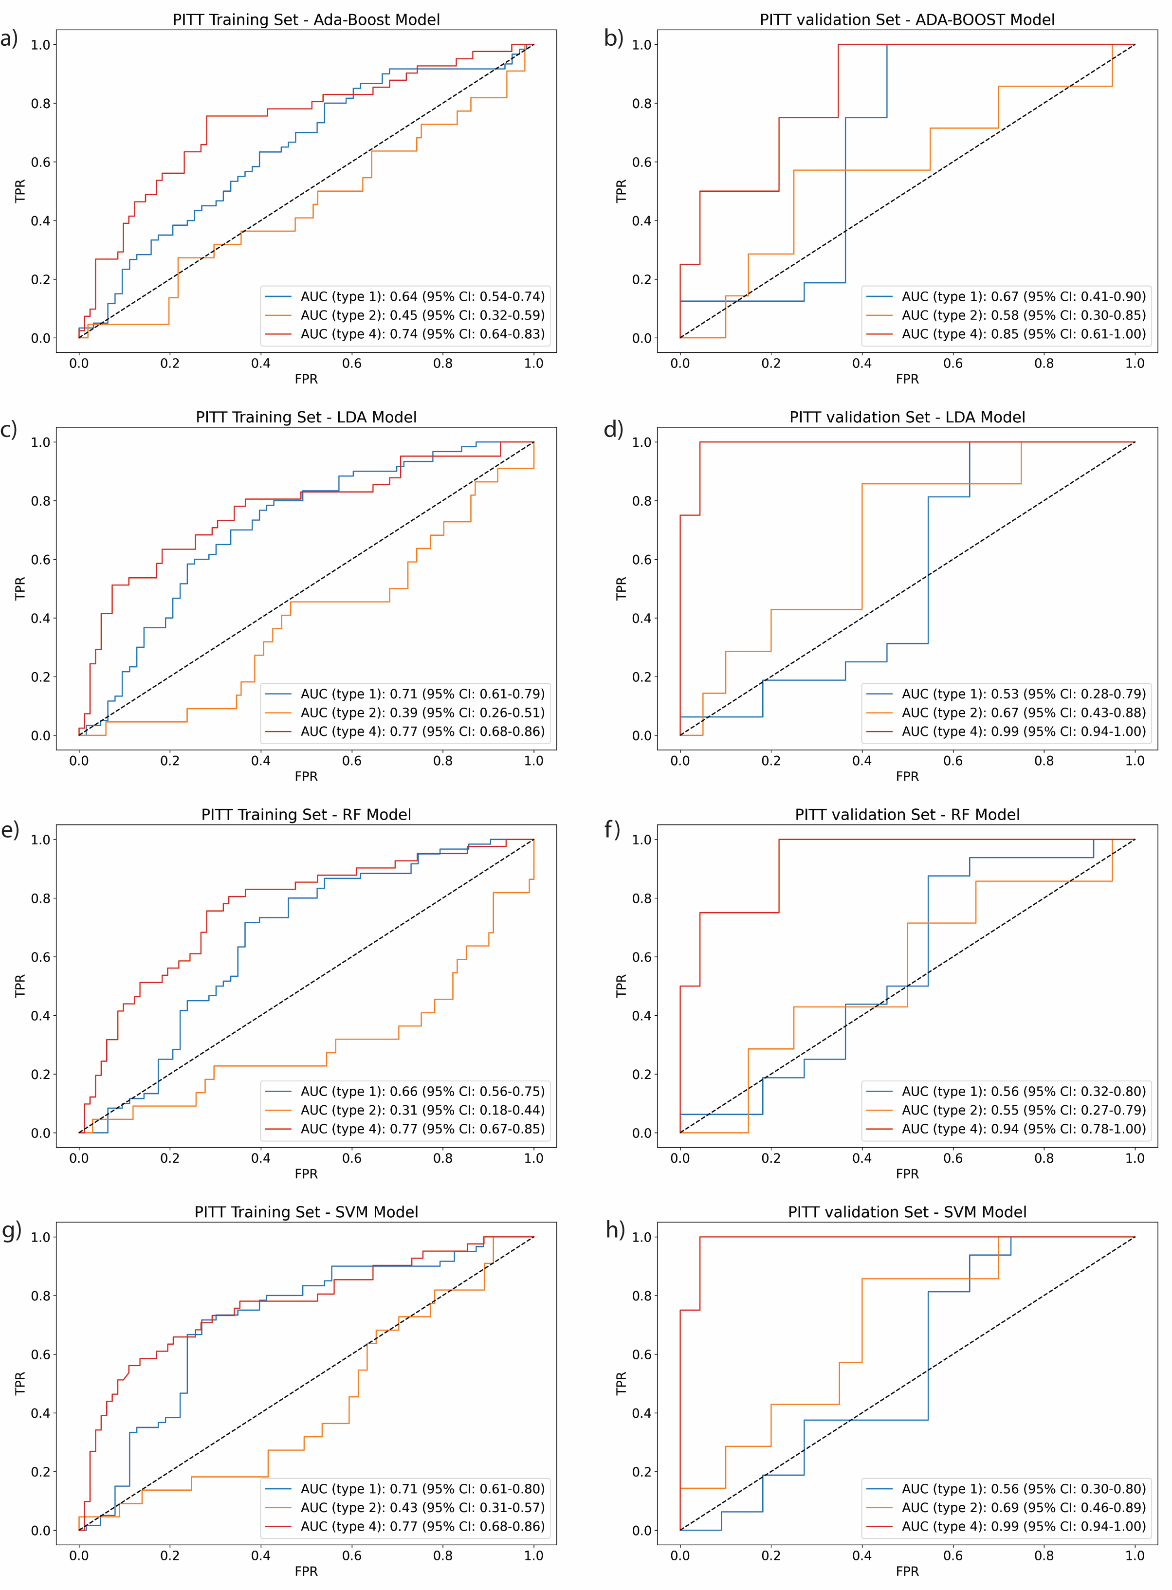


**Figure S10.** ROC plots and AUC values for model performance for the Pitt data, using the OvA approach and the top 5 features. Models evaluated are (a, b) Ada-Boost, (c, d) LDA, (e, f) RF and (g, h) SVM.


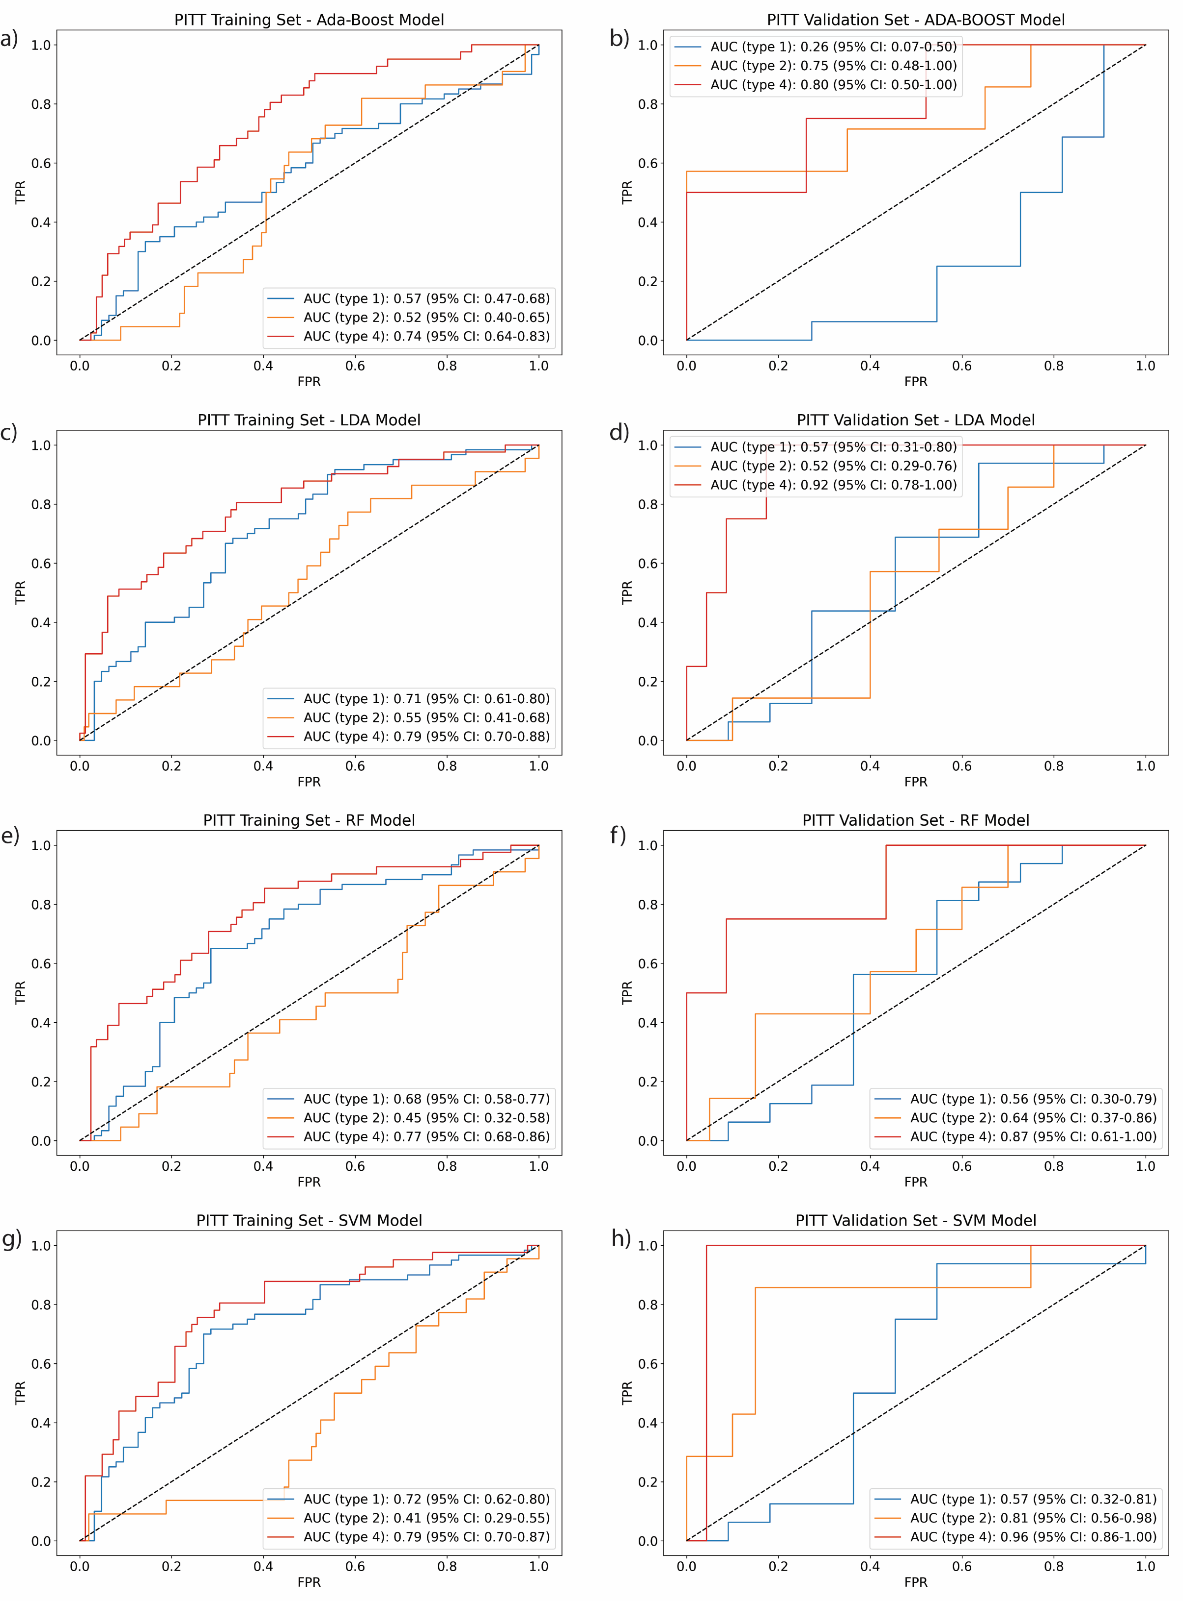


**Figure S11.** ROC plots and AUC values for model performance for the Pitt data, using the MC approach and the top 10 features. Models evaluated are (a, b) Ada-Boost, (c, d) LDA, (e, f) RF and (g, h) SVM.


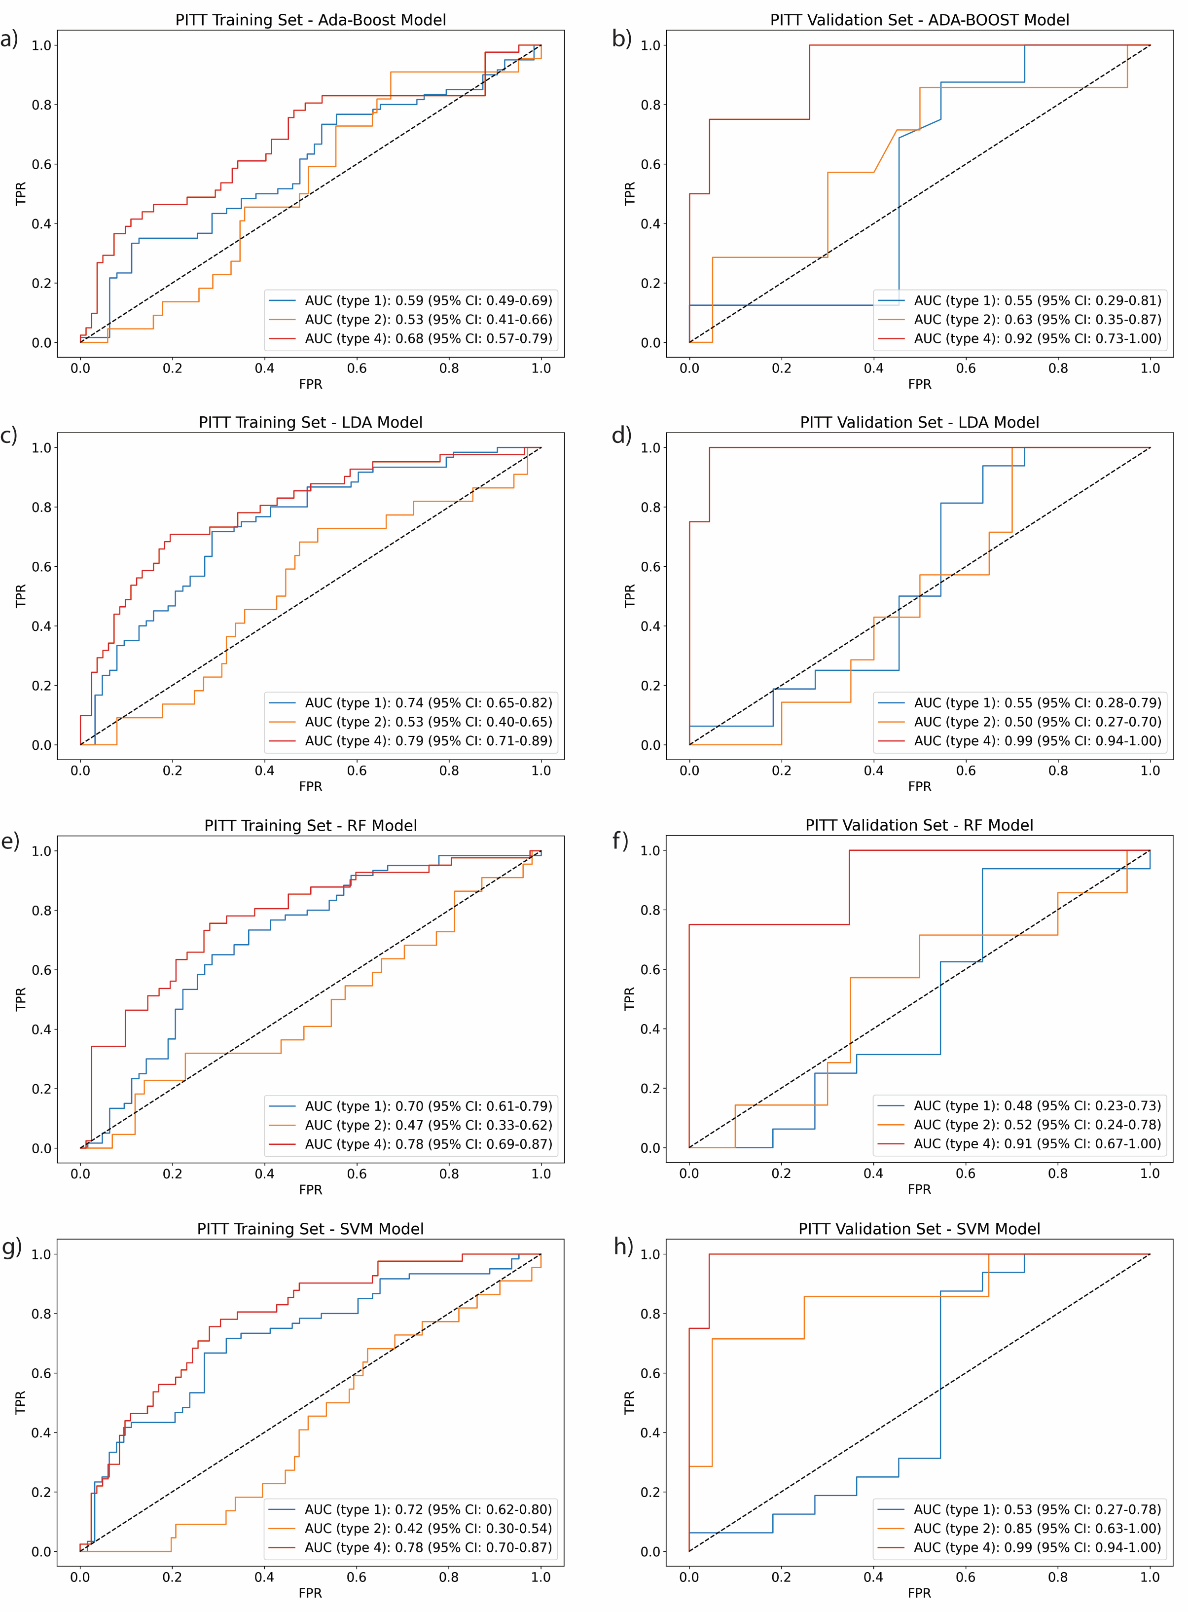


**Figure S12.** ROC plots and AUC values for model performance for the Pitt data, using the MC approach and the top 5 features. Models evaluated are (a, b) Ada-Boost, (c, d) LDA, (e, f) RF and (g, h) SVM.


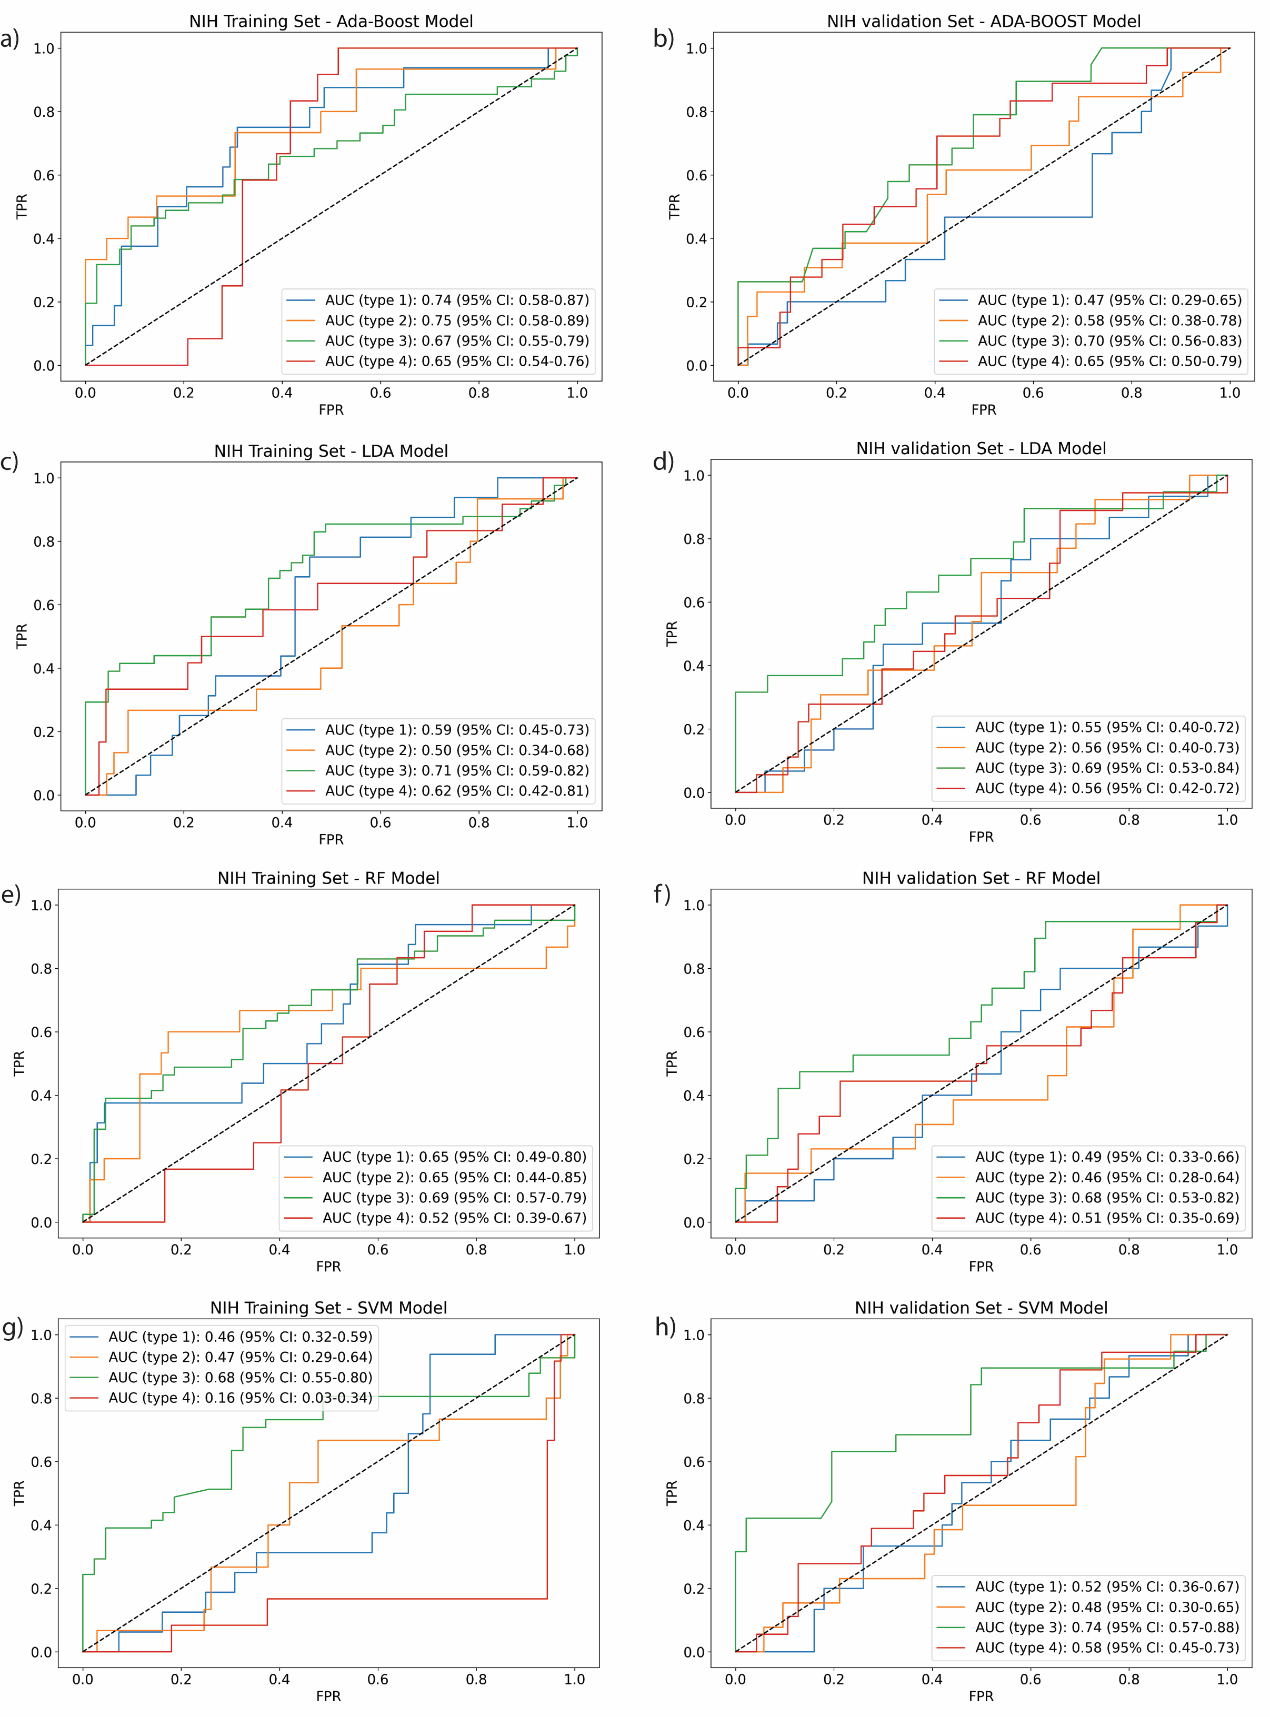


**Figure S13.** ROC plots and AUC values for model performance for the NIH data, using the OvA approach and the top 10 features. Models evaluated are (a, b) Ada-Boost, (c, d) LDA, (e, f) RF and (g, h) SVM.


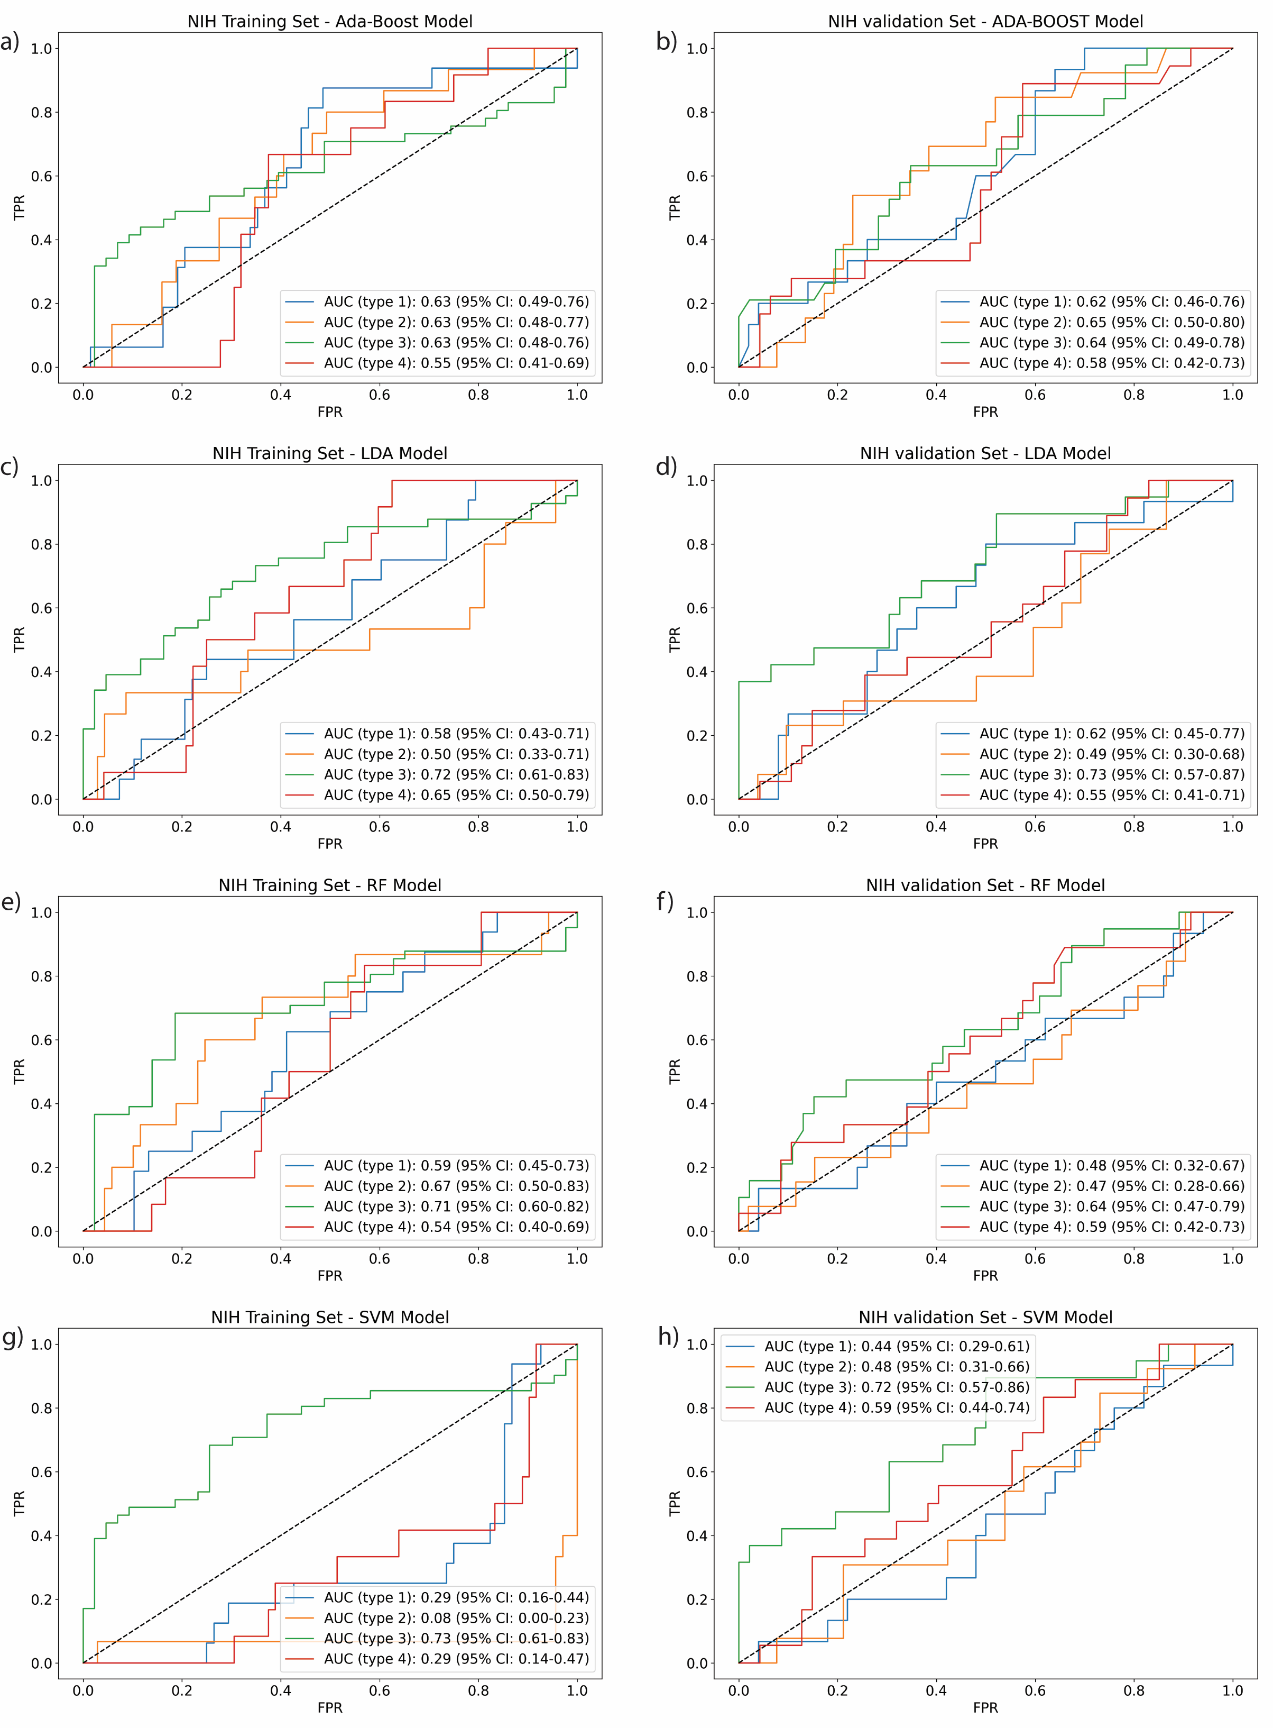


**Figure S14.** ROC plots and AUC values for model performance for the NIH data, using the OvA approach and the top 5 features. Models evaluated are (a, b) Ada-Boost, (c, d) LDA, (e, f) RF and (g, h) SVM.


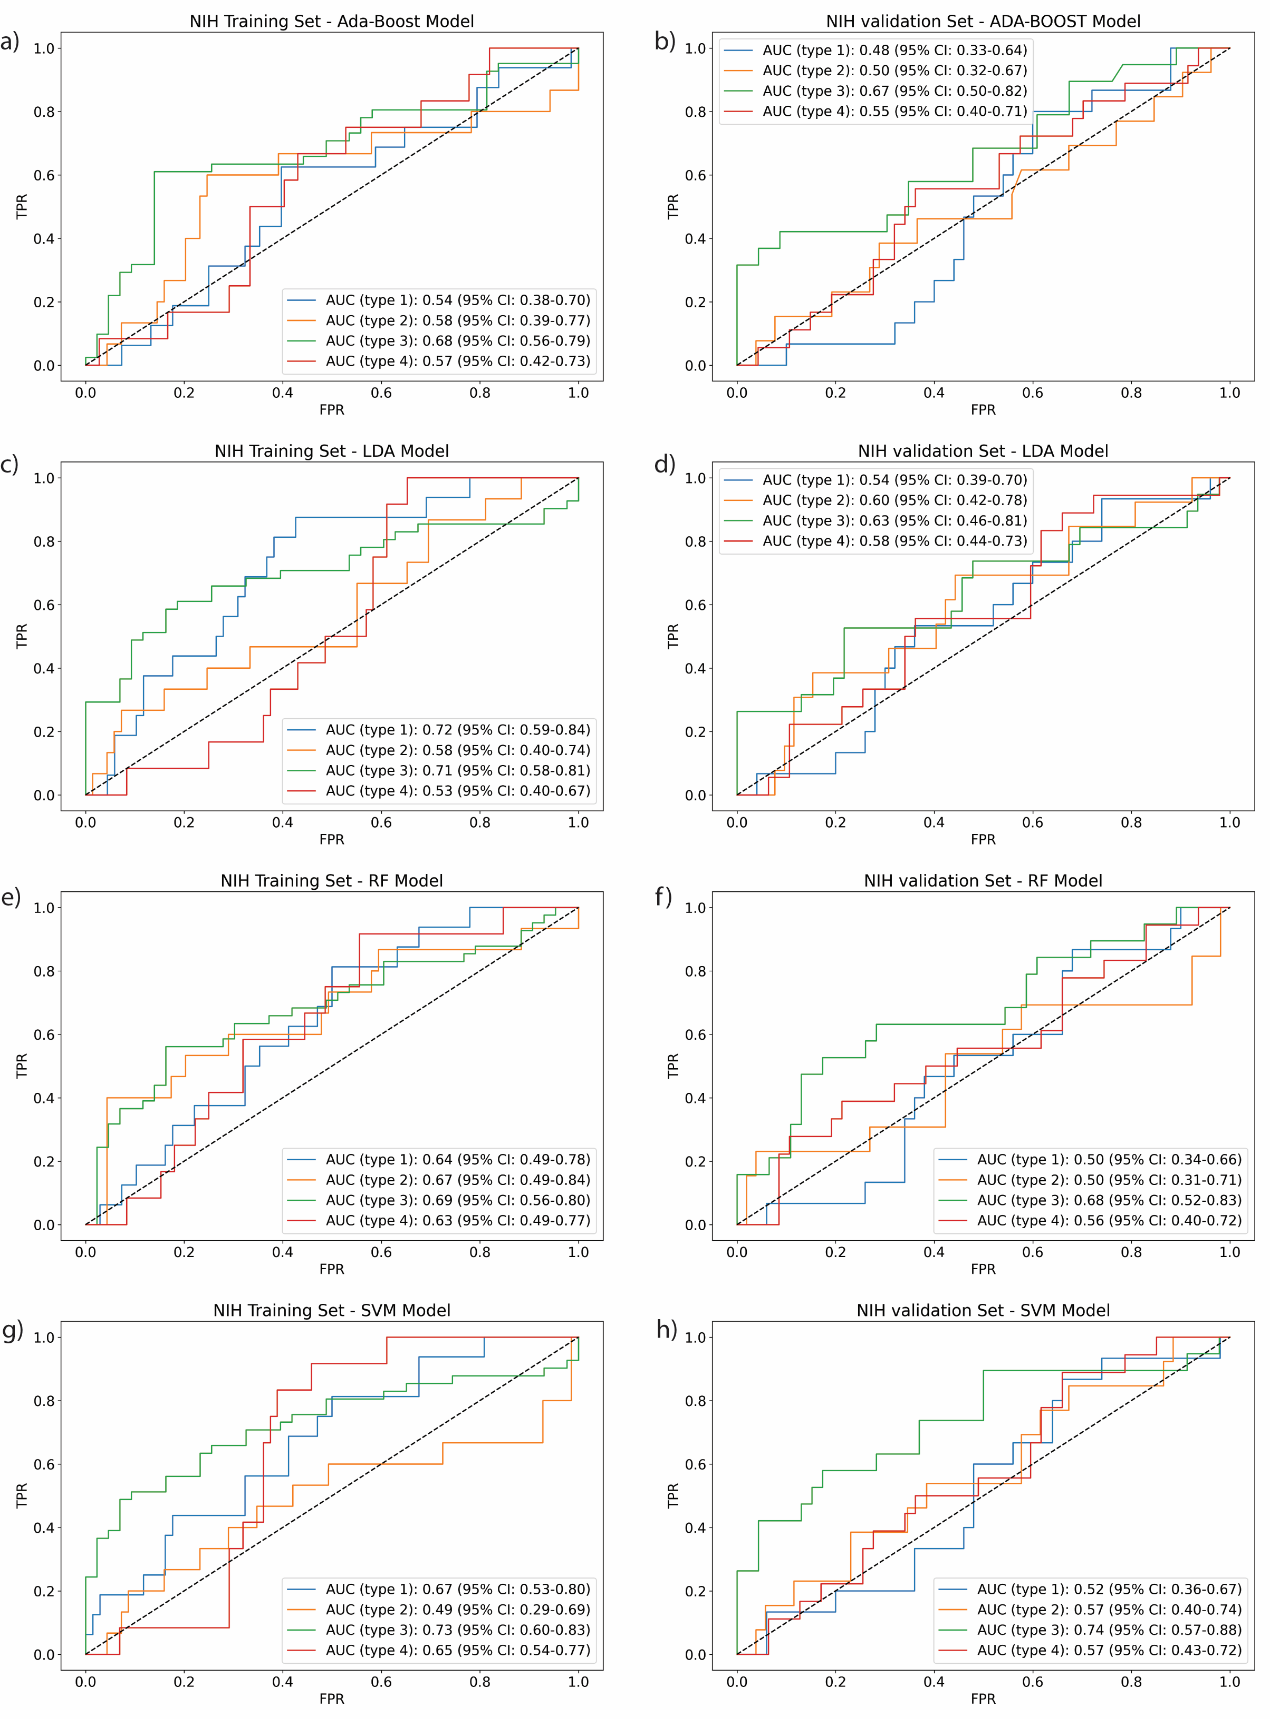


**Figure S15.** ROC plots and AUC values for model performance for the NIH data, using the MC approach and the top 10 features. Models evaluated are (a, b) Ada-Boost, (c, d) LDA, (e, f) RF and (g, h) SVM.


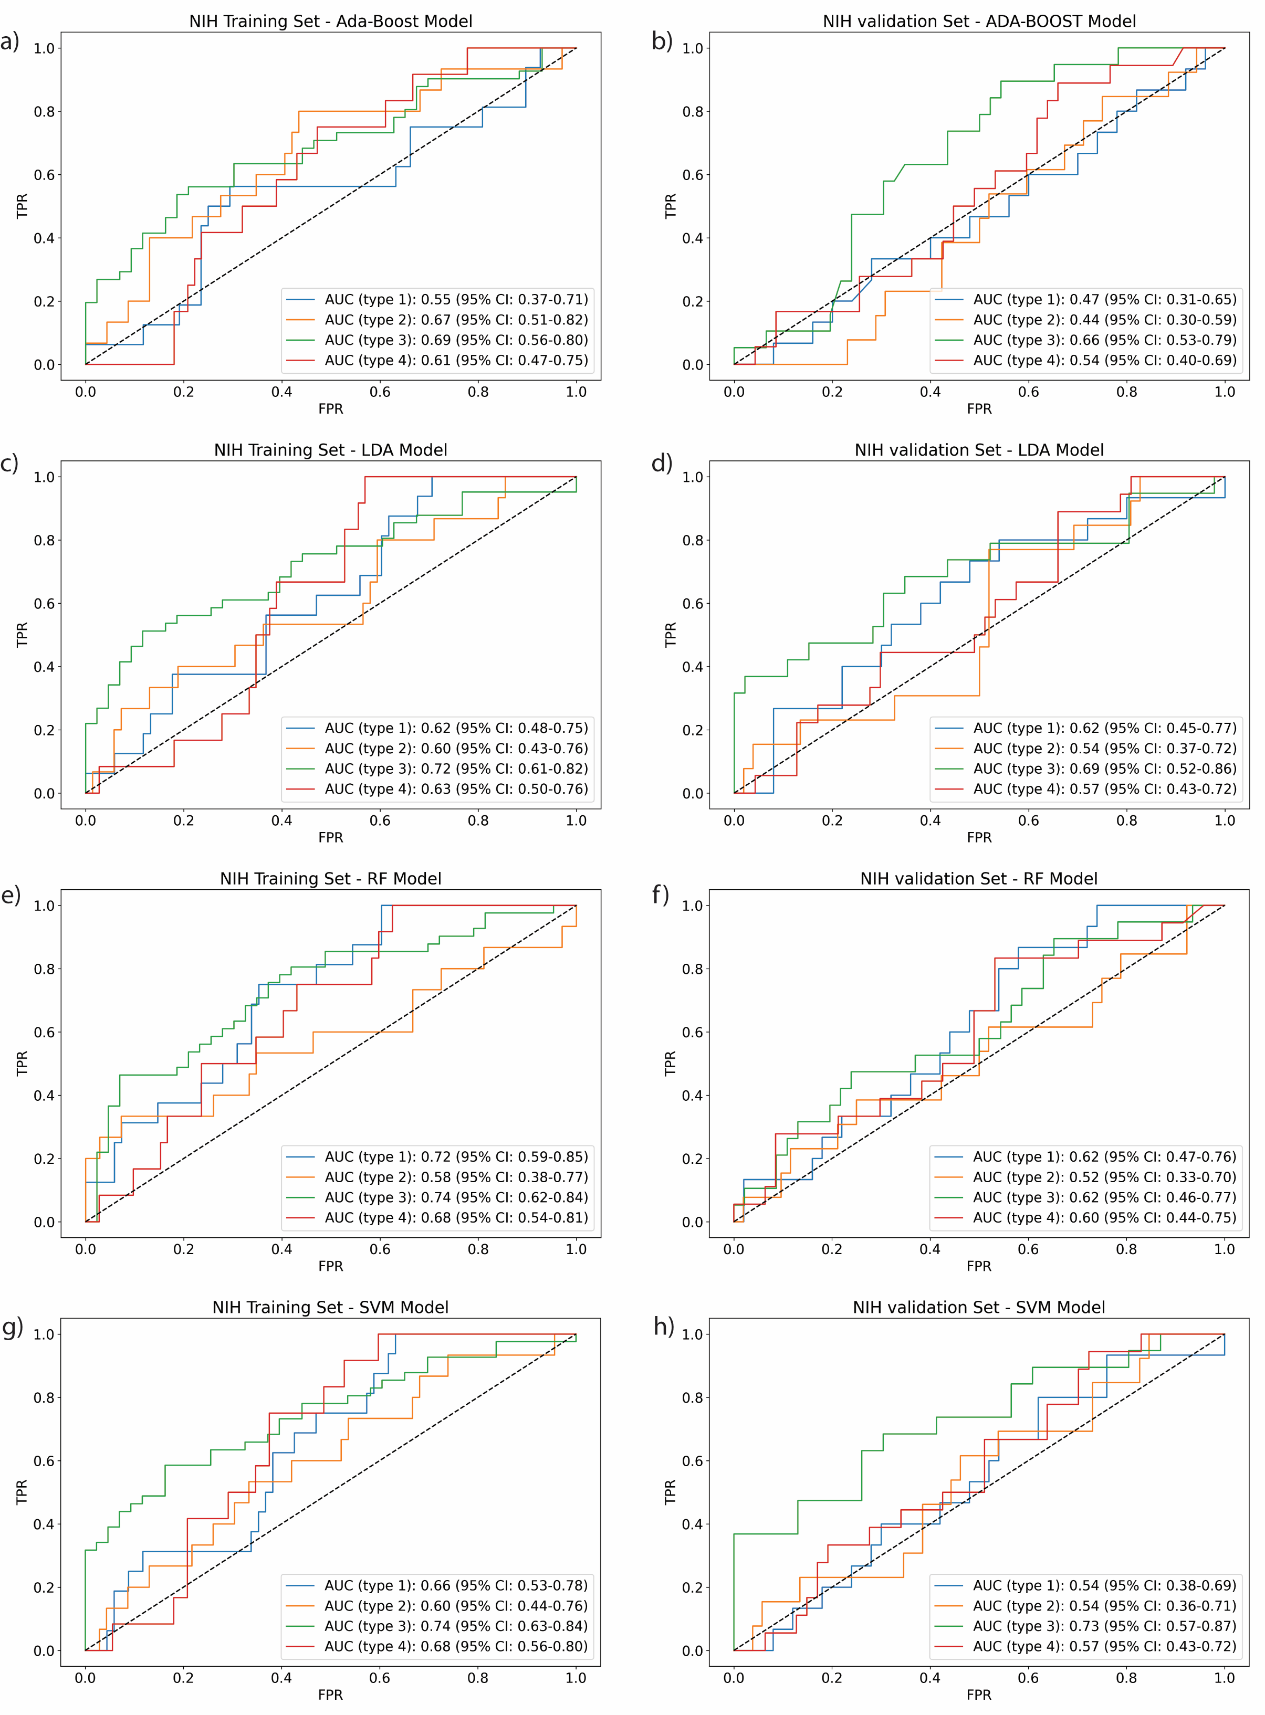


**Figure S16.** ROC plots and AUC values for model performance for the NIH data, using the MC approach and the top 5 features. Models evaluated are (a, b) Ada-Boost, (c, d) LDA, (e, f) RF and (g, h) SVM.
