# Supplementary material
Source: Research Square preprint supplement (doi:10.21203/rs.3.rs-6822856/v1)
Supplement: Supplementary file 2 [file 98ed6b9a801dbb5cf3fbb0a5.xlsx]

## Sheet: Marmoset (NIH)
Analysis set	Marmoset ID	Gender	Age at infection (years)	Infection duration (days)	Treatment	Treatment Duration (mo)	Histologically-matched lesions included #	Total # lesions	Reference		References
Training	BH13	F	3.4	110	LZD	2	3	9	1, 2, 3
Training	BI05	M	3.4	75	AZD-5847	1	7	15	4		1) Boshoff HIM, Young K, Ahn YM, Yadav VD, Crowley BM, Yang L, Su J, Oh S, Arora K, Andrews J, Manikkam M, Sutphin M, Smith AJ, Weiner DM, Piazza MK, Fleegle JD, Gomez F, Dayao EK, Prideaux B, Zimmerman M, Kaya F, Sarathy J, Tan VY, Via LE, Tschirret-Guth R, Lenaerts AJ, Robertson GT, Dartois V, Olsen DB, Barry CE 3rd. Mtb-Selective 5-Aminomethyl Oxazolidinone Prodrugs: Robust Potency and Potenti…
Training	BI07	F	3	112	LZD	2	4	17	1, 2, 3
Training	BI39	M	2.6	109	LZD	2	1	10	1, 2, 3		2) Budak M, Via LE, Weiner DM, Barry CE 3rd, Nanda P, Michael G, Mdluli K, Kirschner D. A systematic efficacy analysis of tuberculosis treatment with BPaL-containing regimens using a multiscale modeling approach. CPT Pharmacometrics Syst Pharmacol. 2024 Apr;13(4):673-685. doi: 10.1002/psp4.13117. Epub 2024 Feb 26. PMID: 38404200; PMCID: PMC11015080.
Training	BI66	M	3.4	77	LZD	1	5	10	4
Training	BI76	M	6.6	106	PZA	2	2	8	2, 3		3) Greenstein T, Via LE, Moraes MP, Weiner DM, et al., PET/CT multivariate tuberculosis treatment response profiles in marmosets unify disparate preclinical biomarkers. Sci Tran Med, in press, 2025.
Training	BJ05	M	3.1	106	Sutezolid	2	3	20	4
Training	BJ16	M	7	103	MOX	2	3	15	2, 3		4) unpublished
Training	BK06	F	2	106	AZD-5847	2	4	8	4
Training	BK28	F	1.2	107	Sutezolid	2	2	13	4		Oxa* an unpublished oxazolidinone
Training	BL03	M	5.2	102	Oza*	2	4	13	4
Training	BL18	F	4.4	102	Oza*	2	4	12	4
Training	BM01	F	3.2	106	RIF	2	4	13	2, 3
Training	BM02	M	2.8	106	Comp 9	2	1	21	1
Training	BM12	F	2.5	106	Comp 9	2	1	11	1
Training	BM26	F	3.2	106	Comp 9	2	7	14	1
Training	BM40	M	2	108	INH/PZA	2	1	21	2, 3
Training	BM44	F	3.3	103	MOX	2	3	9	2, 3
Training	BN13	M	3.4	103	MRZE	2	2	13	2, 3
Training	BN18	F	3.2	104	HRZE	2	2	7	2, 3
Training	BN24	F	3.1	103	HRZE	2	2	7	2, 3
Training	BN27	F	3	102	MRZE	2	7	14	2, 3
Training	BO33	M	2	102	MRZE	2	4	10	2, 3
Training	C508c	F	4	102	MOX	2	7	14	2, 3
Training	CJ157						1
Training	M11309	F	3.7	77	AZD-5847	1	1	5	4
Validation	750NB	F	5.9	107	INH/PZA	2	4	10	2, 3
Validation	BF01	F	6.6	75	Sutezolid	1	3	13	4
Validation	BI04	M	3	110	Radezolid	2	6	11	4
Validation	BI60	M	6.7	107	RIF	2	3	9	4
Validation	BI63	F	2.6	76	LIN	1	4	8	4
Validation	BI71	M	2.5	80	LIN	2	7	17	4
Validation	BJ45	F	5.8	106	PZA	2	6	10	2, 3
Validation	BK12	F	2	107	AZD-5847	2	1	5	4
Validation	BM22	M	2.3	107	INH	2	2	13	2, 3
Validation	BM25	F	3.6	103	Oza*	2	8	12	4
Validation	BM33	F	2.1	107	INH	2	4	14	2, 3
Validation	BM41	F	2	108	INH/PZA	2	5	12	2, 3
Validation	BM45	F	2.4	114	RIF	2	5	6	2, 3
Validation	M299	M	5	108	INH	2	5	8	2, 3
Validation	UMA3	M	1.7	108	Sutezolid	2	3	9	4

## Sheet: Macaque (Pitt)
NHP	IACUC_Protocol	SET	Publications	Species	Origin	Gender	Infection Date	birthdate
916	15126588	training	PMID: 28947646; PMID: 30383808	Cyno		MALE	2016-02-18	2009-11-23
2016	15126588	training	PMID: 28947646; PMID: 30383808	Cyno		MALE	2016-02-25	2009-08-09
2312	11110045	training	PMID: 28947646; PMID: 30383808; PMID: 27379816; PMID: 36611221; PMID: 24664509; PMID: 25611466	Cyno	China	MALE	2012-07-31	2006-09-17
2712	11090030	training	PMID: 30383808; PMID: 27379816; PMID: 36611221	Cyno	China	MALE	2012-08-21	2006-04-15
4116	15055811	training	PMID: 28947646	Cyno	China	MALE	2016-05-12	2009-09-04
4216	15055811	training	PMID: 28947646	Cyno	China	MALE	2016-05-12	2010-06-19
6116	15035407	training	PMID: 30224552	Mauritius Cyno	Mauritius	MALE	2016-07-21	2008-07-03
6216	15035407	validation	PMID: 30224552	Mauritius Cyno	Mauritius	FEMALE	2016-07-21	2008-08-02
6516	15035407	validation	PMID: 30224552	Mauritius Cyno	Mauritius	FEMALE	2016-07-21	2008-12-05
9511	1105870	training	PMID: 28947646; PMID: 36611221; PMID: 24336248; PMID: 24664509	Cyno	China	MALE	2011-10-24	2006-03-10
9515	14043492	training	unpublished	Cyno		MALE	2015-08-18	2006-08-23
9711	1105870	training	PMID: 28947646; PMID: 36611221; PMID: 24336248	Cyno	China	MALE	2011-10-17	2006-04-27
9811	1105870	training	PMID: 28947646; PMID: 36611221; PMID: 27379816; PMID: 24664509; PMID: 25611466	Cyno	China	MALE	2011-10-17	2006-01-02
13516	15126588	validation	PMID: 28947646	Cyno	China	MALE	2016-07-14	2009-03-14
14112	12060181	training	PMID: 27379816; PMID: 36611221	Cyno	China	MALE	2013-03-11	2008-01-12
14512	12060181	training	unpublished	Cyno	China	MALE	2012-12-14	2007-06-05
14612	12060181	training	unpublished	Cyno	China	MALE	2012-12-14	2007-06-11
15312	12060181	training	PMID: 36611221; PMID: 30383808	Cyno	China	MALE	2013-03-08	2008-01-04
15712	12060181	validation	PMID: 30383808; PMID: 27379816; PMID: 36611221	Cyno	China	MALE	2012-12-11	2008-01-25
15812	12060181	training	unpublished	Cyno	China	MALE	2013-03-11	2007-09-01
17211	11090030	training	PMID: 30383808; PMID: 27379816; PMID: 36611221; PMID: 24664509; PMID: 25611466	Cyno	China	MALE	2012-07-31	2006-02-25
18317	17091258	validation	PMID: 31894150	Rhesus	China	MALE	2017-12-11
19117	17091258	training	PMID: 31894150	Rhesus	China	MALE	2017-12-18
20512	12080653	training	PMID: 28947646; PMID: 30383808; PMID: 36611221	Cyno	China	MALE	2013-07-12	2007-03-03
20712	12080653	training	PMID: 28947646; PMID: 30383808; PMID: 27379816; PMID: 36611221	Cyno	China	MALE	2013-07-12	2007-05-02
21112	11110045	training	PMID: 28947646;PMID: 30383808; PMID: 36611221	Cyno	China	MALE	2013-10-07	2007-04-17
22610	1003622	training	PMID: 27379816; PMID: 36611221; PMID: 30383808	Cyno			2011-04-26
22810	1003622	training	PMID: 27379816; PMID: 36611221; PMID: 30383808; PMID: 24336248	Cyno			2011-05-17
23010	1003622	training	PMID: 27379816; PMID: 36611221	Cyno			2011-05-24
