# Supplementary material
Source: Research Square preprint supplement (doi:10.21203/rs.3.rs-6822856/v1)
Supplement: Supplementary file 3 [file c307cc343d31c823e5f6867e.docx]

**Appendix S2.** Standard operating procedure for segmentation of non-human primate tuberculosis (TB) lung lesions in PET/CT images

**Procedure(s):**

1. **Loading and saving the PET and CT scans (DICOMS)- By the end of this step you will make a folder with the ID of the Animal Scan that you are working with within the broader Segmentation folder and save 5 different Amira data files.**
2. Click on the Amira program and open the software
3. Click the open data button
4. Select all the DICOMs in the desired CT scan and open them (Ctrl+A to select all in folder)
5. When the DICOM loader appears, click OK
6. When the Amira warning window appears click “Convert to Float”. After clicking this button, you will be brought to the Project tab.
7. Right click on the CT data and click “Save Data as” in the window that appears
8. Save the data in the Animal Scan folder with the name “AnimalID_CT”
9. Follow steps 2-4 again
10. When the Amira warning window appears click “ignore scaling”
11. Save the CT that you just loaded with the name “AnimalID_CTnoscaling”
12. Click the open data button
13. Select all the DICOMs in the PET scan that is associated with the CT scan that you loaded
14. When the DICOM loader appears, click OK
15. When the Amira warning window appears click “Convert to float”.
16. Save the PET that you just loaded with the name “AnimalID_PT”
17. Follow steps 11-13 again
18. When the Amira warning window appears click “ignore scaling”
19. Save the PET that you just loaded with the name “AnimalID_PTnoscaling”
20. **Create a merged PET/CT scan and save it**
21. Right click on the project view and click “create object”
22. Then search for “MergeCT + PET & Register Labels” and click it
23. When the window comes up uncheck “check input type”
24. Add the CT data and PET data in the CT and PET input rows
25. The raw labels input can be anything (PET or CT or labels)
26. Click OK and after the computation happens find the red “Arithmetic” box with lines drawn the to the data structure that ends with “PET+CTmerged”
27. And in the expression replace the number 8 with the number 40 and then hit “Apply” in the bottom of the properties window
28. Then save the Merged PET and CT data with the format “AnimalID_PET+CTmerged”
29. **Open another Amira window to reference the overlaid PET/CT**
30. Open another window of the Amira program
31. Click the green Open Data button in the top left
32. Go to the folder of the specific AnimalID that you are segmenting
33. Select the “AnimalID_PTnoscaling”, “AnimalID_CTnoscaling” and the “AnimalID-PET+CTmerged” Amira data structures and open them
34. After the data has been opened click on the Multiplanar tab and check the “Overlay Data” section and overlay the PET data on the CT to view the PET activity
35. Switch back to the segmentation tab and view the PET+CTmerged if you would like another method of viewing the PET overlaid on CT
36. In one monitor keep up the Amira window with the Overlaid PET/CT and in the other monitor expand the original Amira window with the CT opened
37. **Recommendation: Set up the PET/CT overlay as a visual reference on one monitor**

**Option 1:** Load the PET and CT scans in MIM to reference the overlaid PET/CT…finish

**Option 2:** Open Amira and open the Multiplanar Viewer on the top selection bar and click the overlay data button to overlay the PET to the CT

Use the Edit tool on the right side of the Multiplanar Viewer to better view the PET scans with overlays such as ‘temperature’ or ‘glow’.

This overlaid PET/CT scan will help identify the lesions when segmenting the corresponding CT scan; the tracer 18Fluorodeoxyglucose (FDG) helps determine where the lesion edges are located. Lymph nodes or other lung structures are identified by both location and structure in the lungs.

1. **Only perform this step if you do not have a ‘Label’ file associated with the AnimalID with at least the body, lungs and outside segmented- At the end of this step you will have a label file that includes the body, lungs and outside of the body and lungs as well as another label file that can be used with the ‘watershed’ tool**
2. Click on the segmentation tab and make a new material named “Body”
3. Make a new material named “Lung” and another new material named “Outside”
4. Using the brush tool create circles on the body in the CT scan and add them to the Body material using the addition tool. Make these circles throughout the body in all XYZ planes (See screenshots in Appendix)
5. Click on the watershed tool in the selection menu (In the segmentation tab) and make sure all of the materials are selected and unlocked
6. Ensure the Landscape image is the CT data
7. Click on “Create a new gradient image” and now the Landscape image should say “gradientAnimalID_CT”
8. Ensure the catchment basins is set to side-by side and the markers are “Selected materials”
9. Click “Appy and create a new label field”
10. You should now see that a new label set has been created with the segmented, body, lungs and outside the body (See screenshots in Appendix)
11. Click the project tab and find the label data with the small circles before the watershed tool was used
12. Save this label data as “AnimalID_labelsforwatershed”
13. Find the new labels with the lungs, body and outside segmented and save it as “AnimalID_labels”
14. You will use that label file for the segmentation of the TB lesions
15. **Segmentation of a lung TB lesion- Before starting this process you need to make sure that you have a label file with (at least) the body, lungs and outside segmented as well as a PowerPoint or pdf with the regions of interest (ROIs) or lesions in that particular scan that you would like to segment.**
16. Click on the segmentation tab in the Amira window and select the CT in the image field
17. Identify a lesion that you would like to segment with the ROIs (lesion ID map) and locate it on the CT in your Segmentation editor (hint: slice numbers and landmarks often helpful in locating the lesion).
18. Reference the overlaid PET/CT to observe the extent of the lesion
19. Within the Segmentation Editor add a new material to the list for your lesion (note: unlock any of your materials that might change when you add this selected lesion)
20. Within the segmentation editor select the plane (XY, XZ, YZ) with the most robust cross-section of the selected lesion. In this context ‘robust’ means that the cross-section can be distinguished from the mediastinum and the pericardium or other structures that might overlap and distort the segmentation lines for radiomics
21. Using the paintbrush tool in the Segmentation Editor to highlight the largest slice of the lesion in the plane you selected. Ensure that your 2D selection encompasses all the lesion in that slice. Including lung air is ok but try to exclude any non-lesion opacities.
22. Expand the selection in 3d by:

Option 1: Select a different plane (from step 5) and then perform step 7 once more Wrap the two selections using radial basis functions with the shortcut Ctrl + W.

Option 2: Perform step 7 by scrolling through the slice you selected and select the ends of the lesion in both directions with paintbrush tool. Interpolate these selections with the shortcut Ctrl+I to interpolate between the highlighted sections

1. You should now have an inclusive 3D selection/volume of the lesion that you will refine. Visualize this volumetric mask in the 3D panel of the segmentation editor
2. Click the plus button in the Selection tab of the Segmentation Editor to add this inclusive volumetric selection of your lesion to the new lesion material
3. Ensure all the lesion is included in your primary lesion mask. If not, add in the missing sections in the relevant slices using the paintbrush tool.
4. Remove any non-lesion tissue such as large vasculature/airways (often visualized as “tubular” structures extending out of the smoother lesion volume like a sprouting potato on the 3D view), mediastinum (bronchi, lymph nodes, large vessels, heart, esophagus), or chest wall. Adjusting the contrast, looking at the PET/CT overlay, as well as visualizing the lesion in 3D are often helpful in spotting non-lesion densities and distinguishing lesion from non-lesion.
5. To delineate between lesion material, keep the overlaid PET/CT Amira window up to determine where there is PET activity and more likely lesion.
6. If you are unsure you can also view the merged PET+CT data within the segmentation editor and observe the PET activity around the lesion which will give you a more general idea as to where the lesion begins and ends
7. Rename the lesion material with the label ID that is given in the ROI pdf or PowerPoint from associated with the respective animal ID (See NIH & PITT formats in appendix)
8. You should now have a volumetric mask that includes only the lesion and some margins of lung (“Primary lesion mask”)
9. Make primary lesion masks for any other lesions that need to be segmented from that animal from the ROIs
10. Remember to keep a spreadsheet of your segmentation process and comment on any ROIs that you would like to return to
11. **Thresholding out lung material from the lesions- In this section we use the thresholding tool to ensure that any part of the lungs is subtracted from the lesions**
    1. Go to the thresholding tool tab in the segmentation window
    2. Lungs will have a maximum HU value of roughly -500 and to subtract this from the lesion you will input -500 into the maximum of the masking window with the Thresholding tool (the minimum should be well below the data histogram minimum)
    3. Click “Selected Masked Voxels” in all slices and lock all materials except the Primary lesion masks you want to clean up and the lung material that will receive the <-500 volume
    4. Add the selected material to the lungs and any lung material that is in the lesions will be placed in the “Lung” materials
